# Supplementary material for: Exploration of Pyrido[3,4-d]pyrimidines as Antagonists of the Human Chemokine Receptor CXCR2
Source: MDPI journal article supplement (doi:10.3390/molecules28052099), 2023-02-23

*Supplementary Material*

# Exploration of Pyrido[3,4-*d*]pyrimidines as Antagonists of the Human Chemokine Receptor CXCR2

Max Van Hoof <sup>1</sup>, Sandra Claes <sup>2</sup>, Katrijn Boon <sup>2</sup>, Tom Van Loy <sup>2</sup>, Dominique Schols <sup>2</sup>, Wim Dehaen <sup>1</sup> and Steven De Jonghe <sup>2,\*</sup>

<sup>1</sup> Molecular Design and Synthesis, Department of Chemistry, KU Leuven, Celestijnenlaan 200F, B-3001 Leuven, Belgium

<sup>2</sup> Department of Microbiology, Immunology and Transplantation, Rega Institute for Medical Research, Laboratory of Virology and Chemotherapy, KU Leuven, Herestraat 49, B-3000 Leuven, Belgium

## NMR Spectra

### 3-Amino-5-chloropyridine-4-carbonitrile (5)

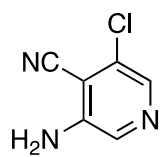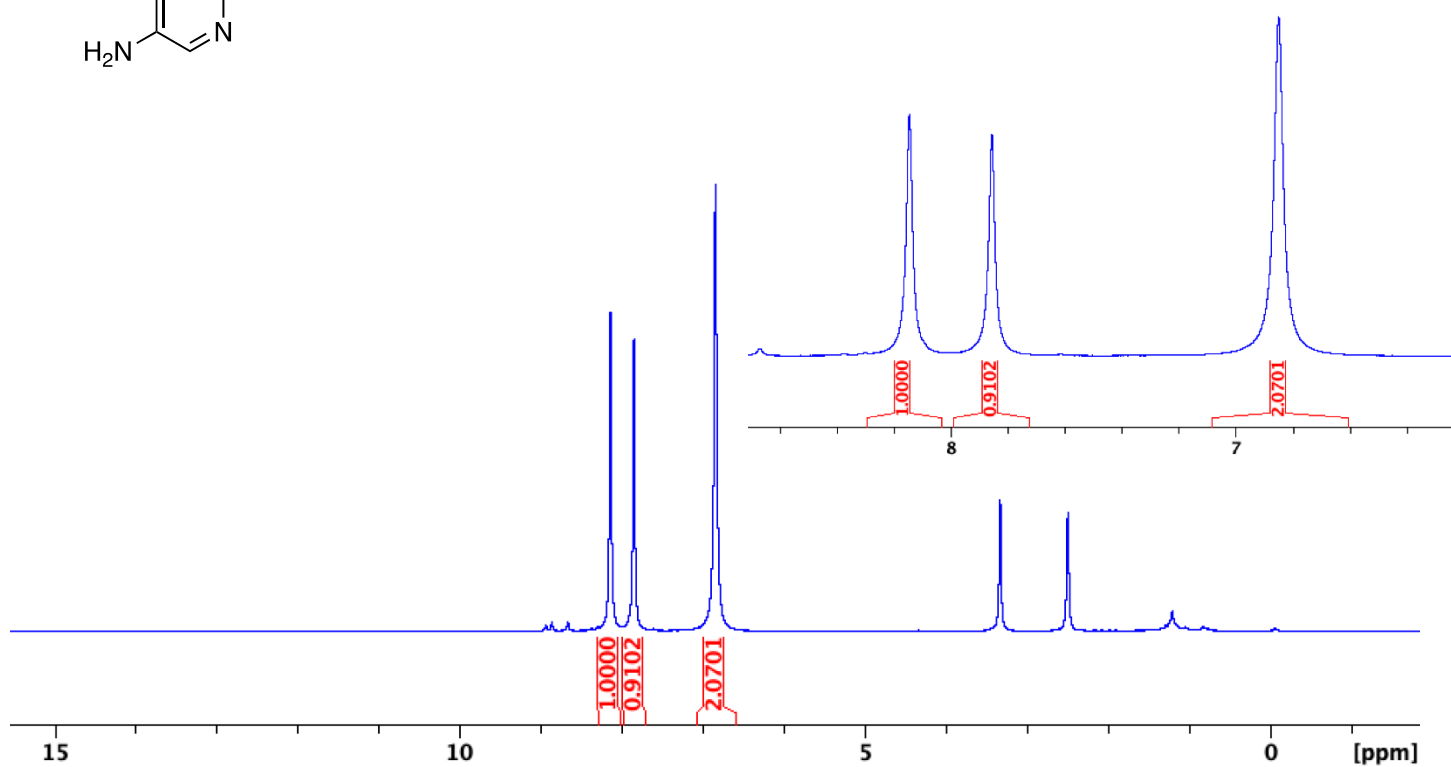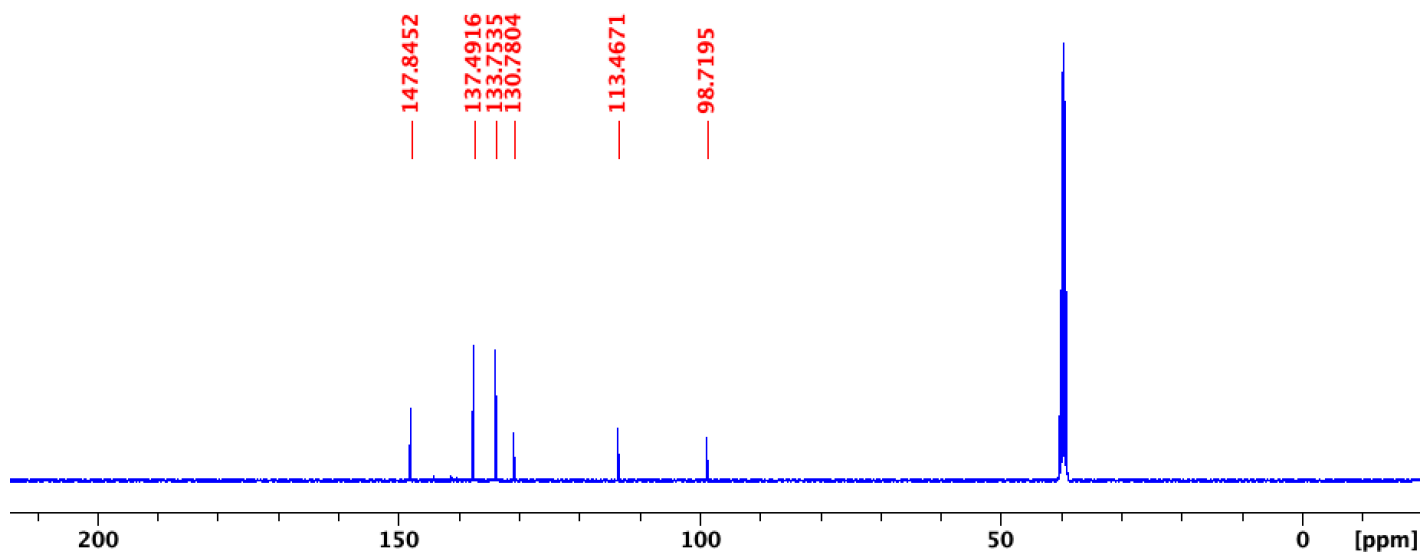

3-Amino-5-chloropyridine-4-carboxamide (6)

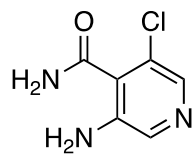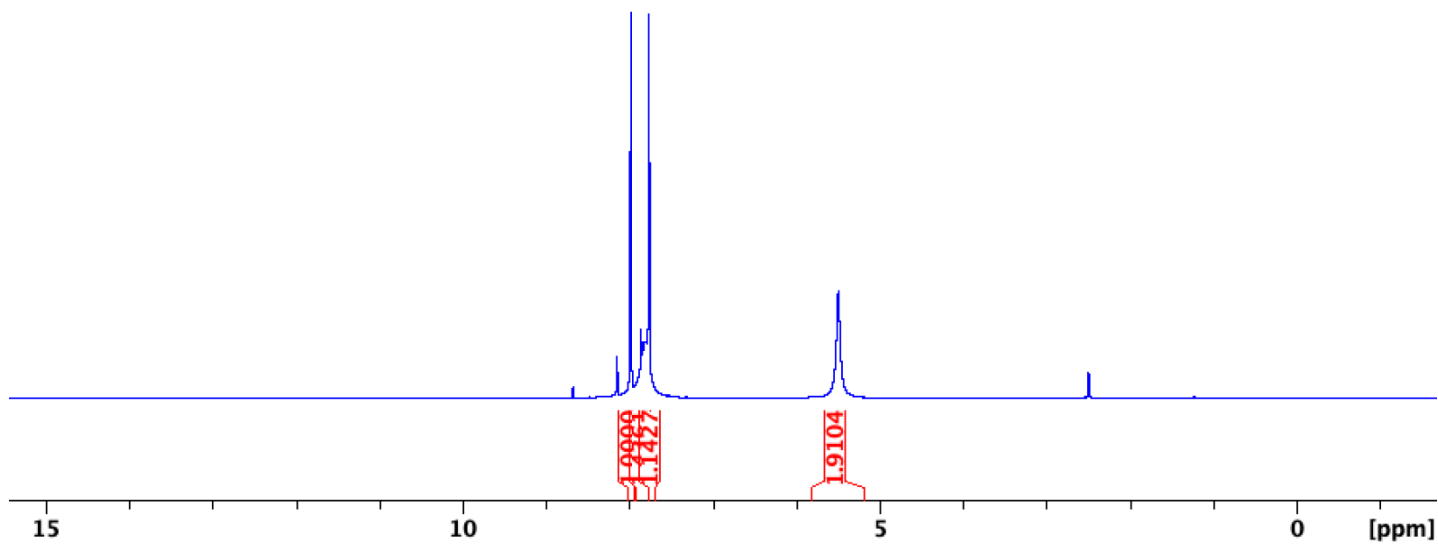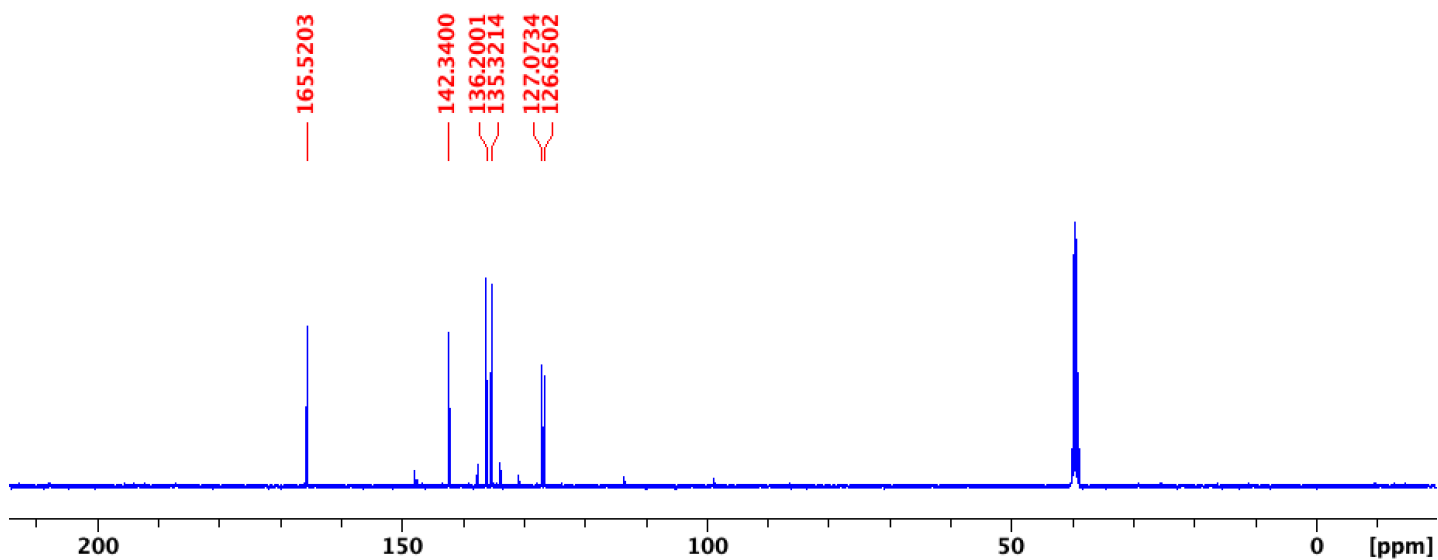

**2-(2,3-Difluorobenzylmercapto)-5-chloropyrido[3,4-*d*]pyrimidine-4-one (8)**

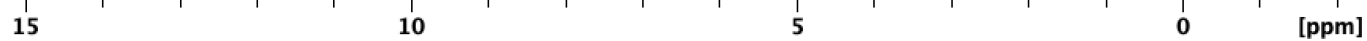

**(2R)-2-[(5-Chloro-2-(2,3-difluorobenzylmercapto)-pyrido[3,4-*d*]pyrimidine-4-yl)amino]propanol (9)**

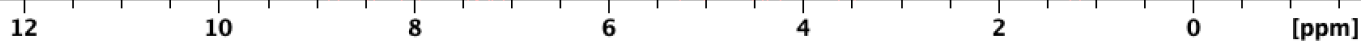

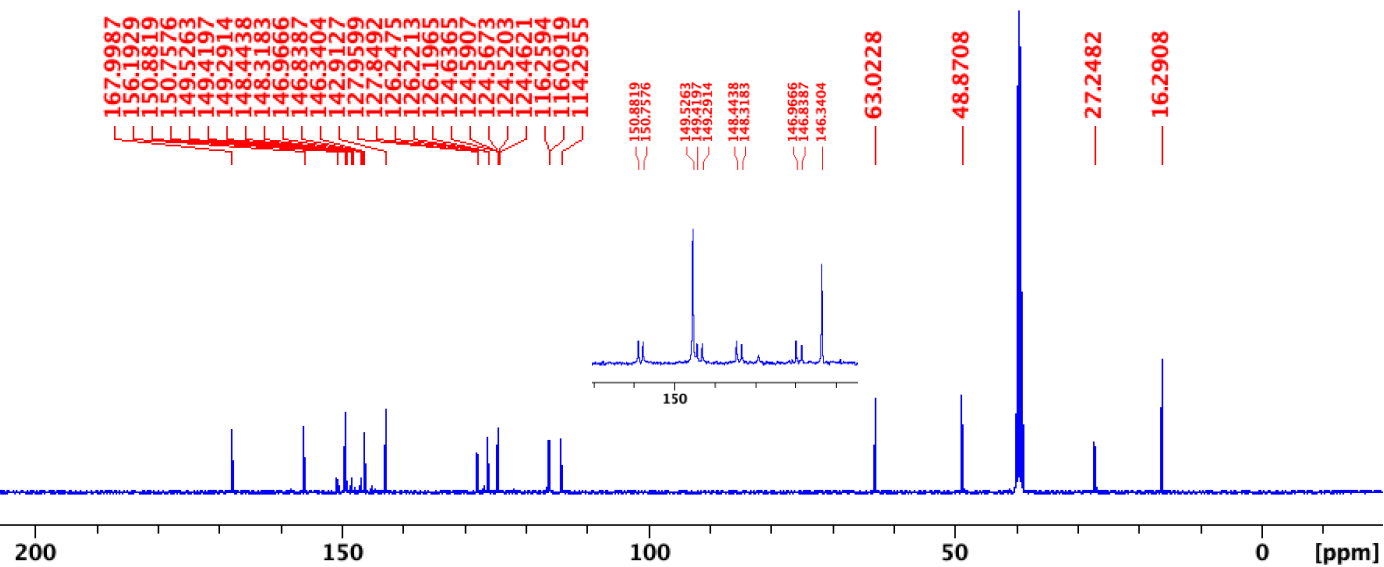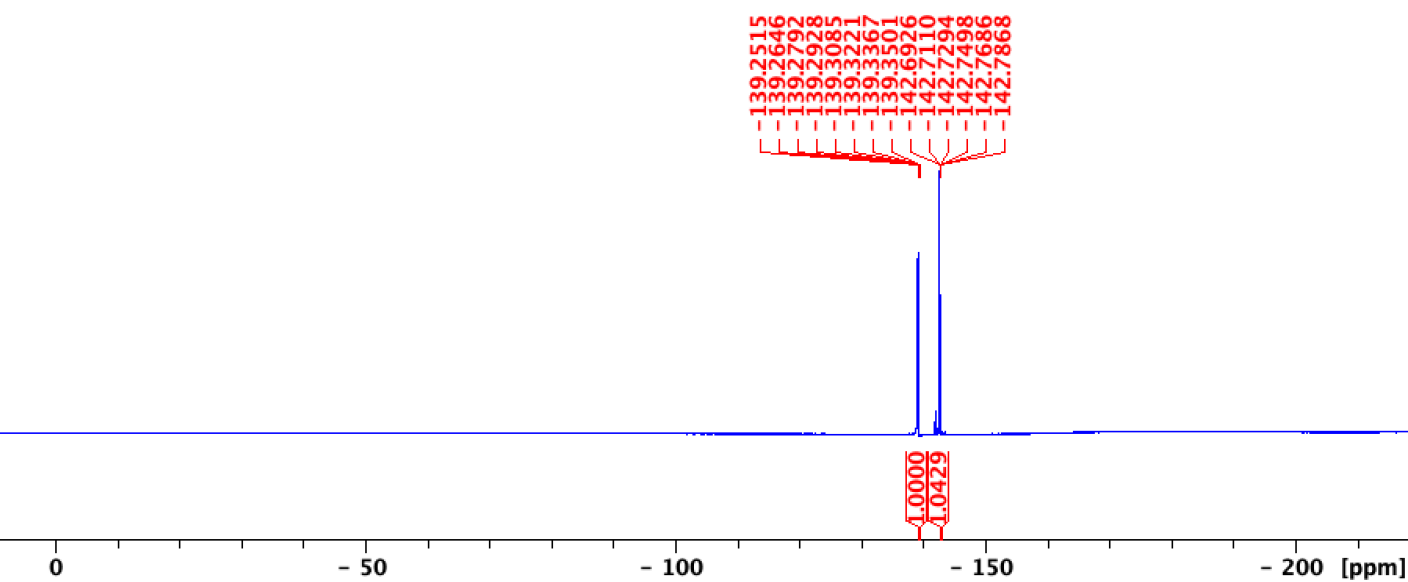

2-Bromo-5-nitropyridine-4-carboxylic acid (11)

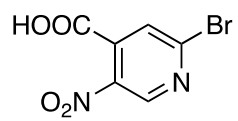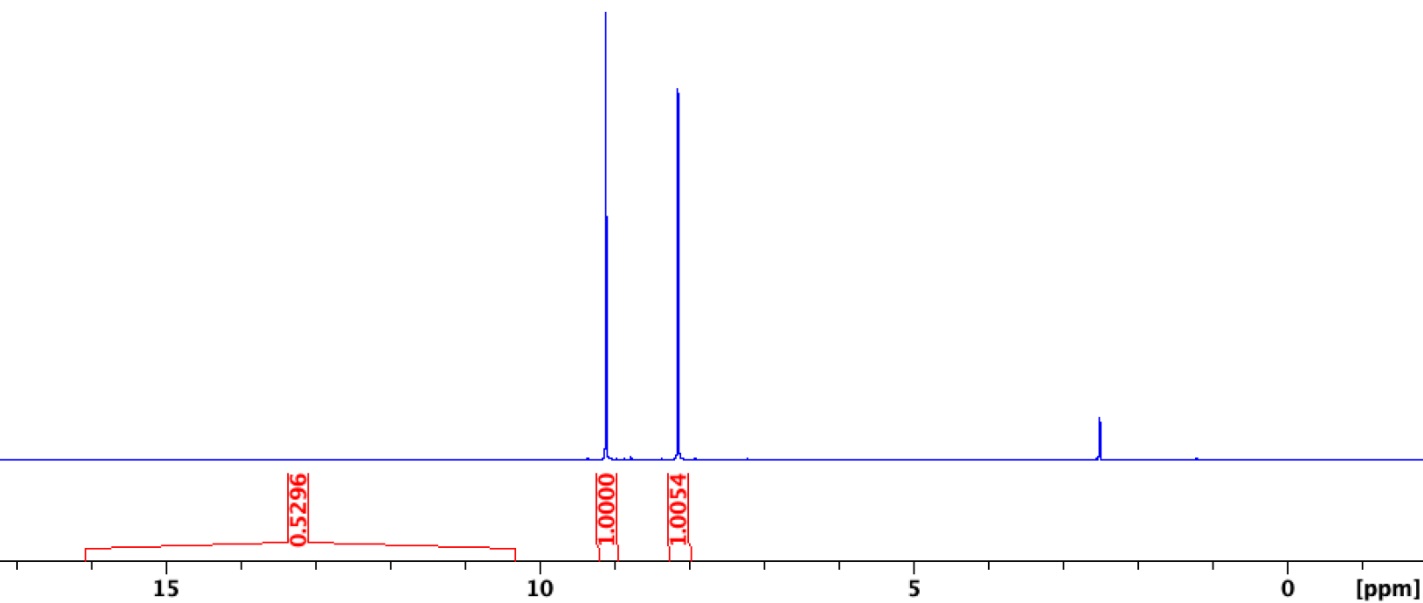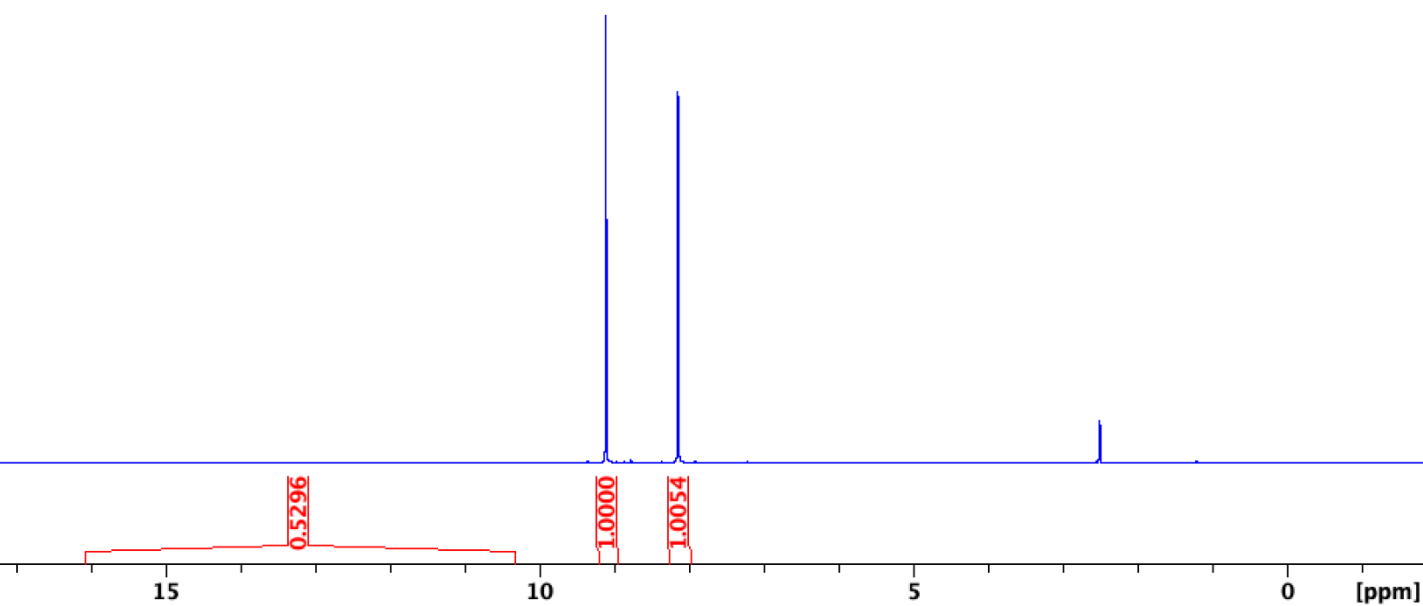

2-Imidazolyl-5-nitropyridine-4-carboxamide (12b)

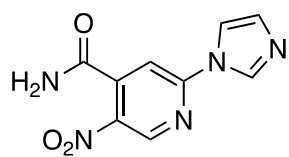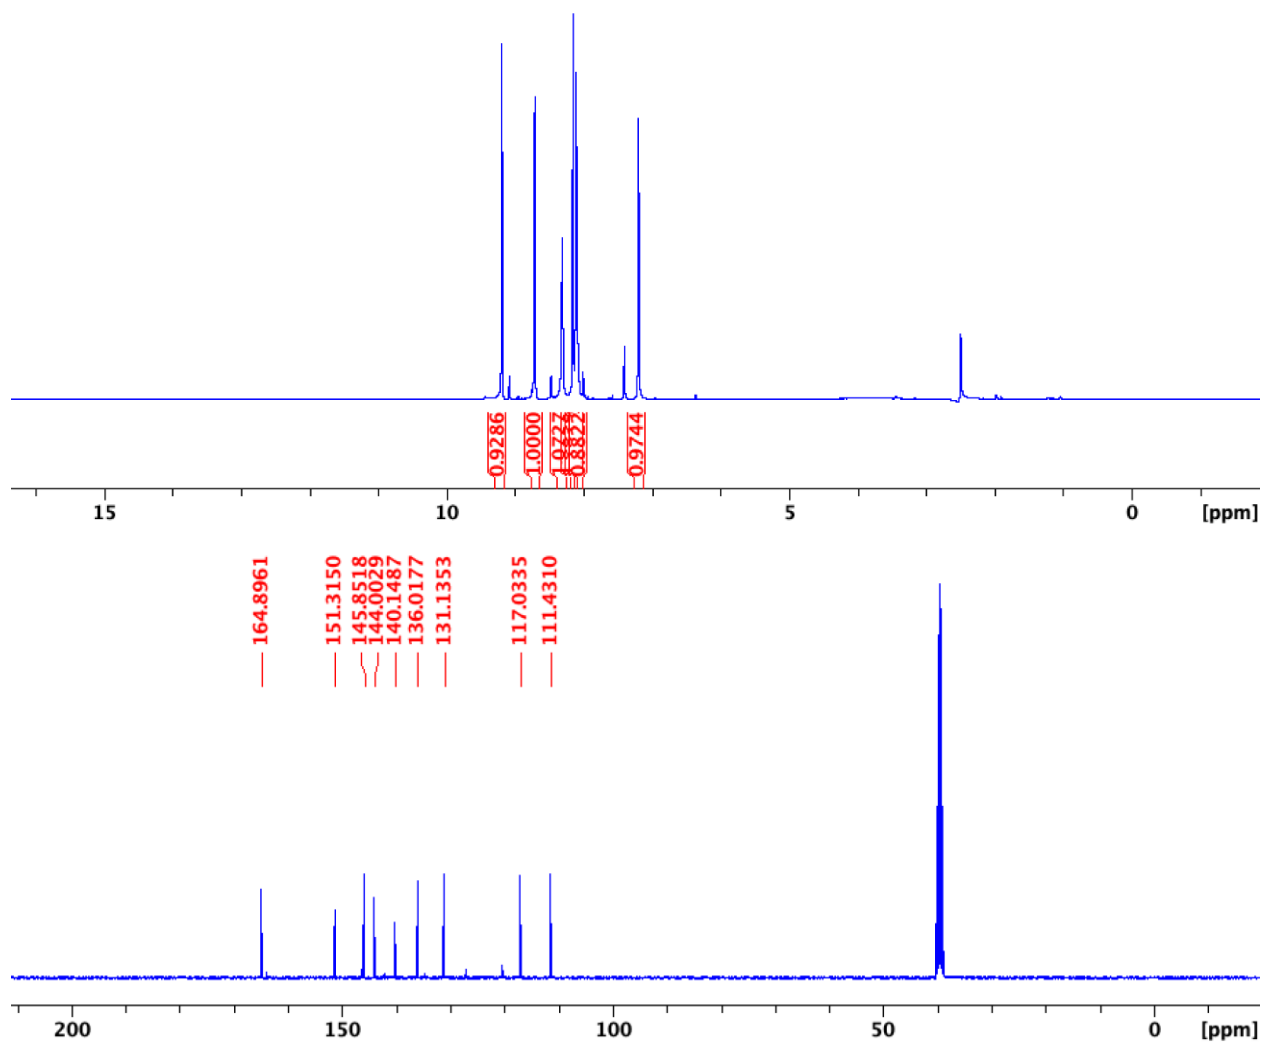

2-Chloro-5-aminopyridine-4-carboxamide (13a)

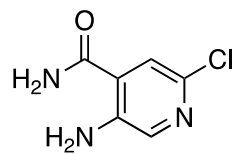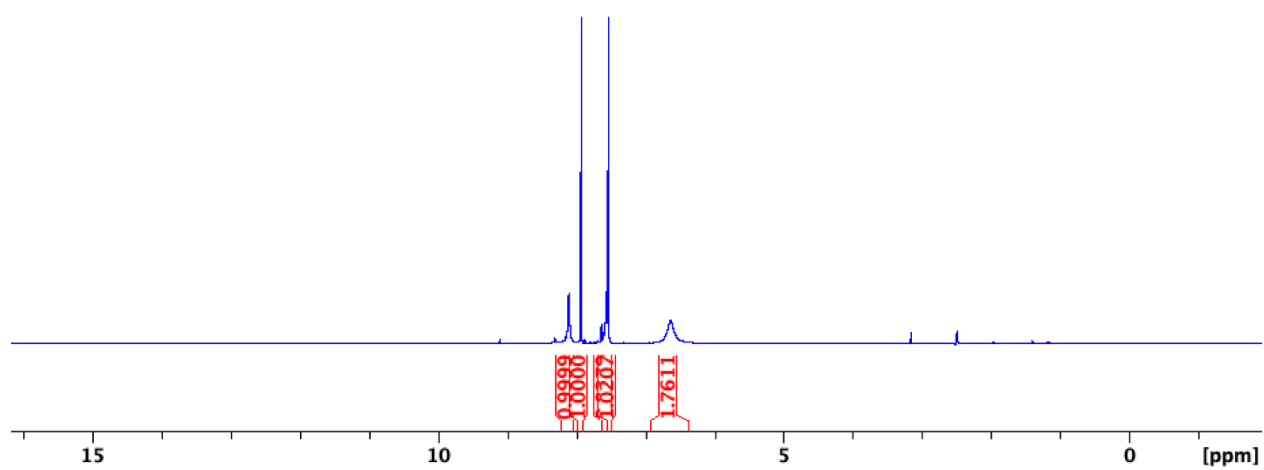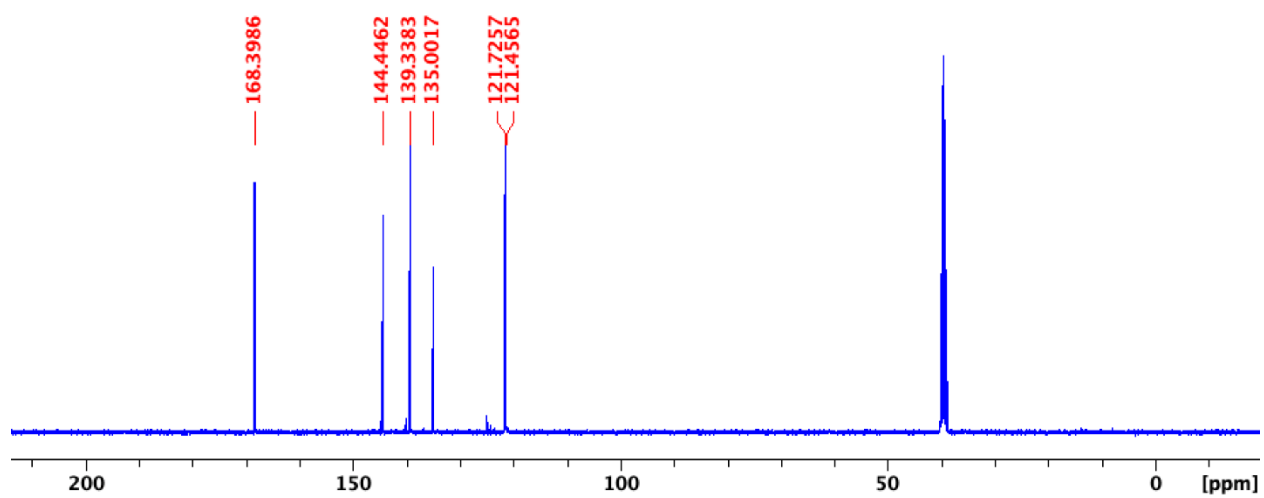



5-Amino-2-imidazolyl-pyridine-4-carboxamide (13b)

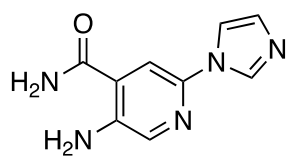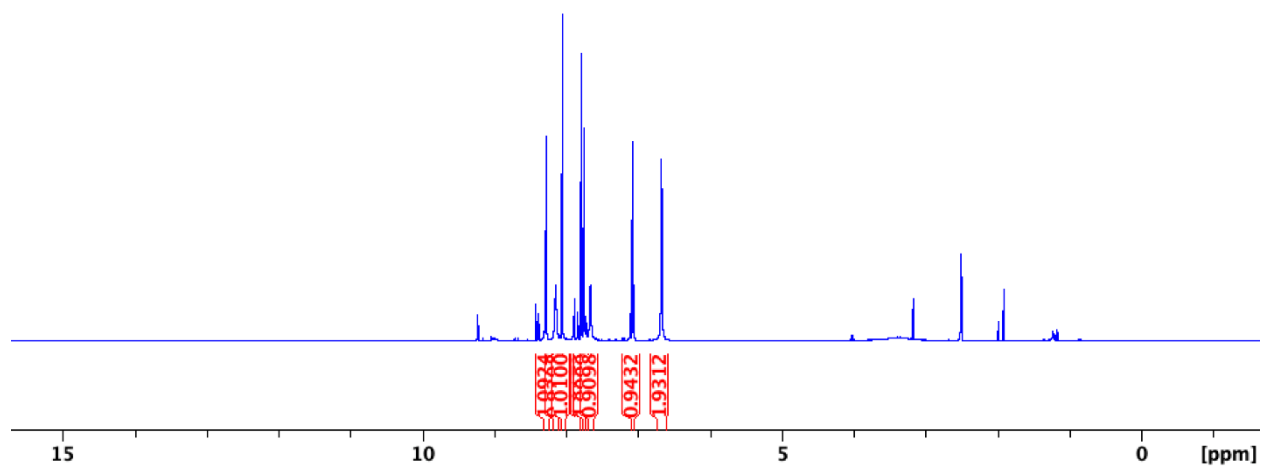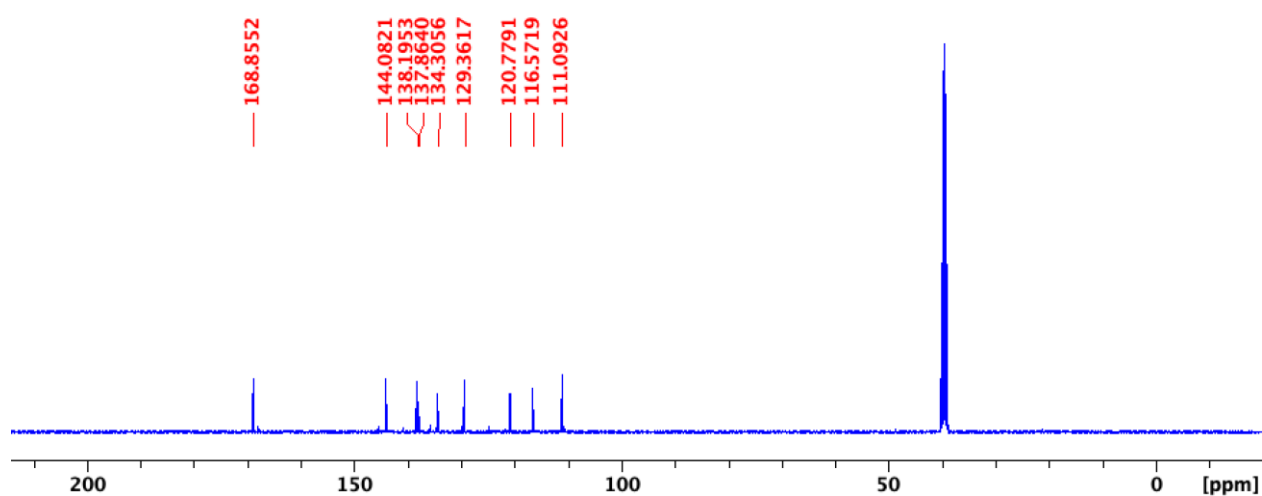

2-(2,3-Difluorobenzylmercapto)-6-chloropyrido[3,4-*d*]pyrimidine-4-one (15a)

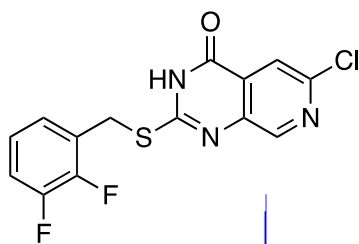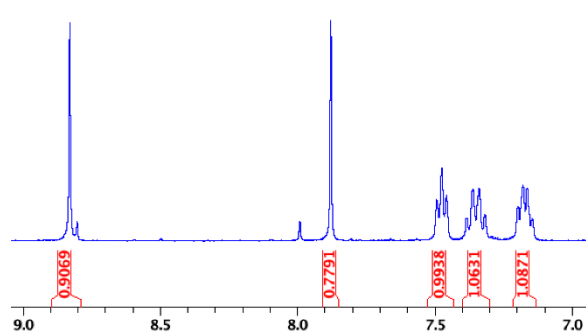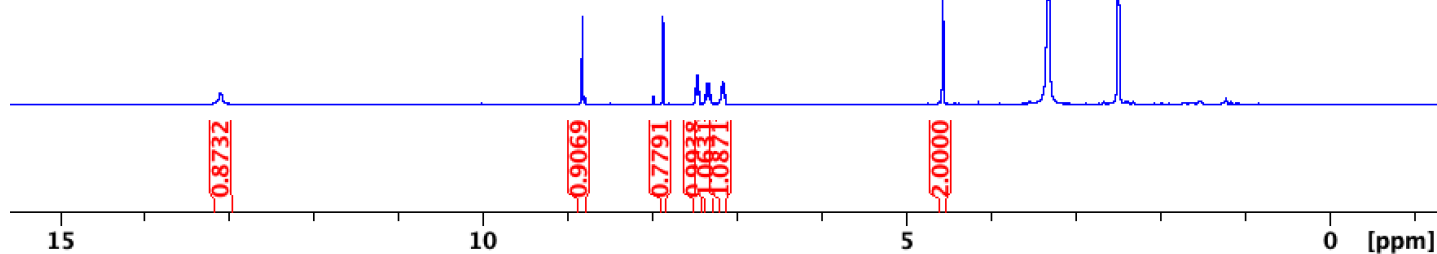

139.1185  
139.1314  
139.1461  
139.1596  
139.1755  
139.1889  
139.2034  
139.2170  
142.0958  
142.1142  
142.1329  
142.1527  
142.1717  
142.1899

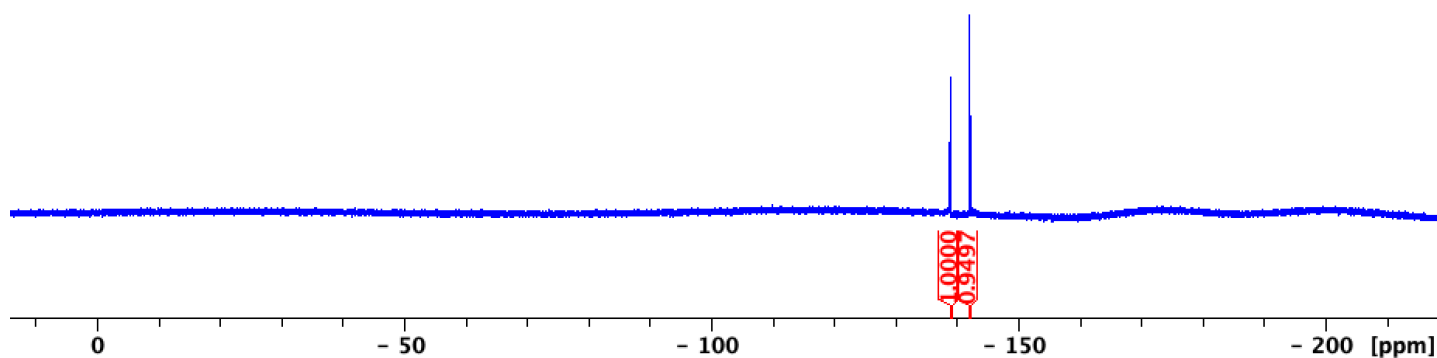

2-(2,3-Difluorobenzylthio)-6-imidazolyl-pyrido[3,4-*d*]pyrimidine-4-one (15b)

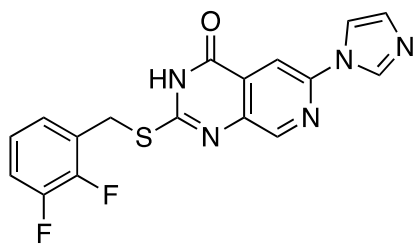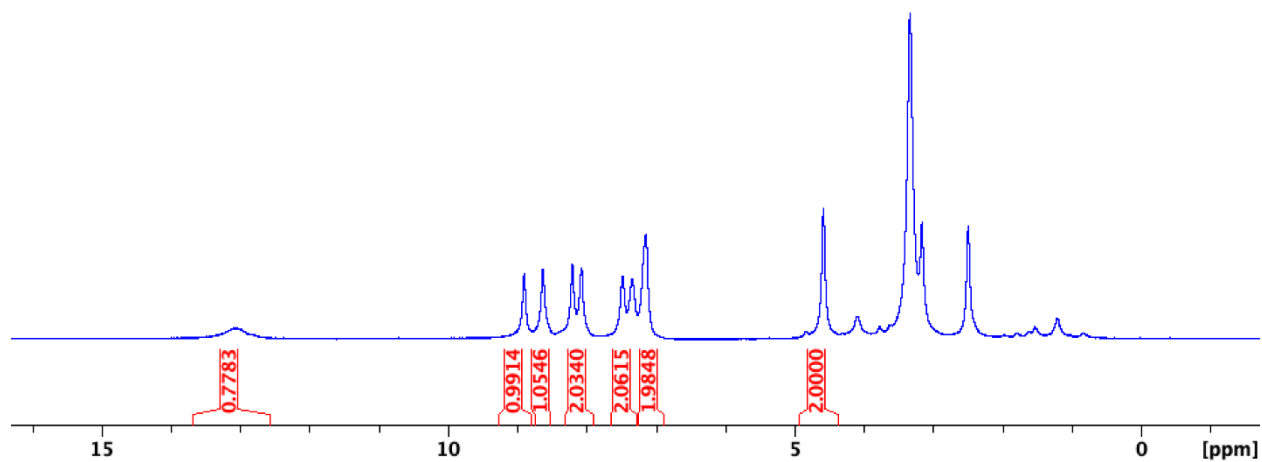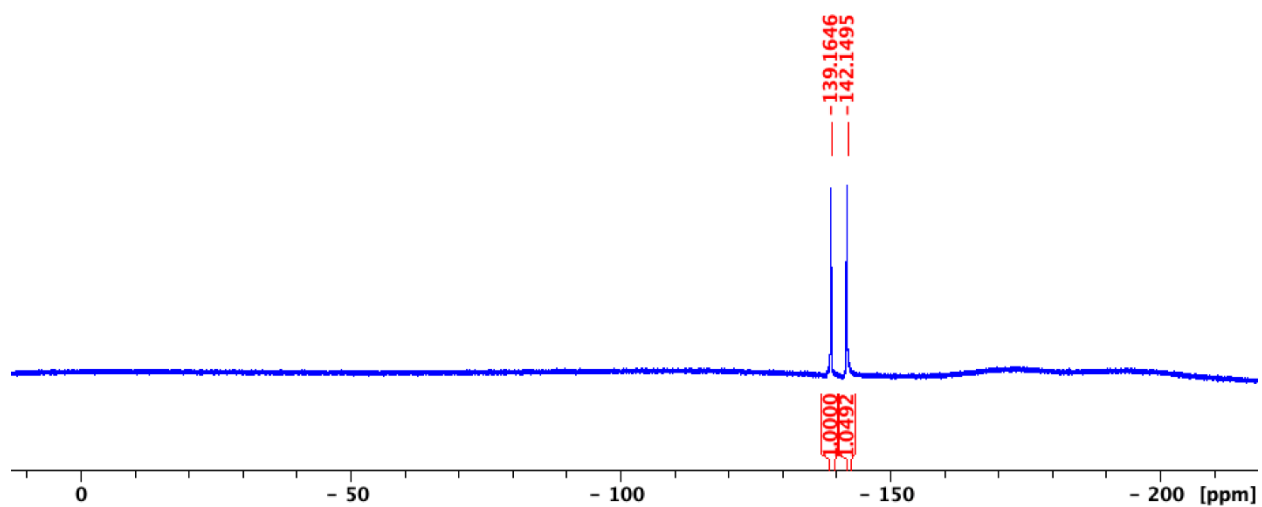

(2R)-2-[(6-Chloro-2-(2,3-difluorobenzylmercapto)-pyrido[3,4-*d*]pyrimidine-4-yl)amino]propanol (16a)

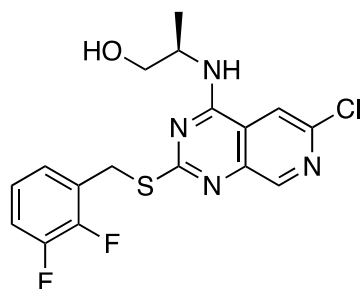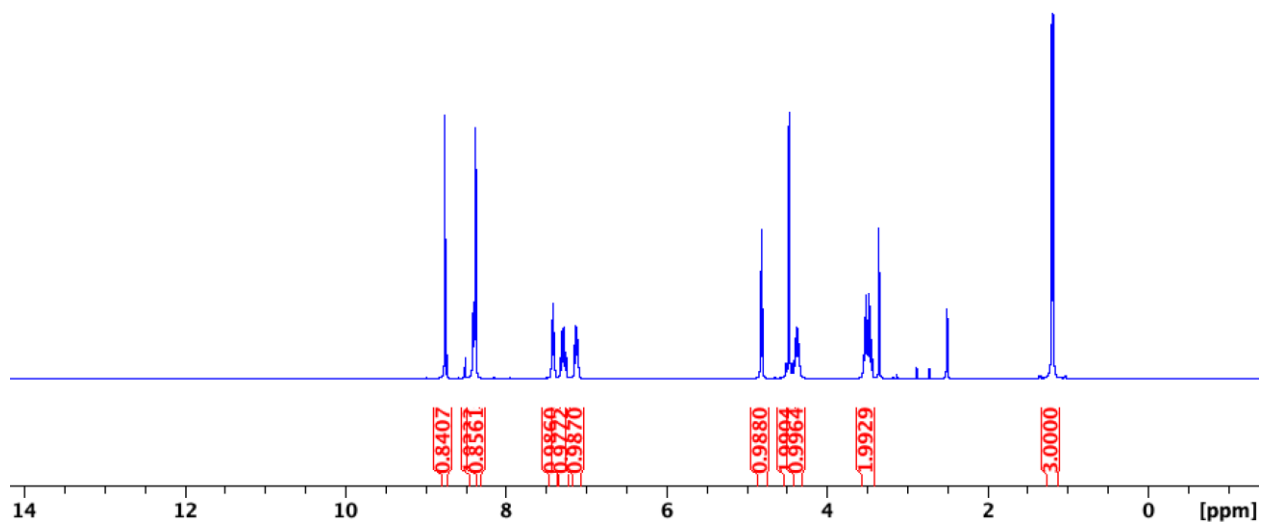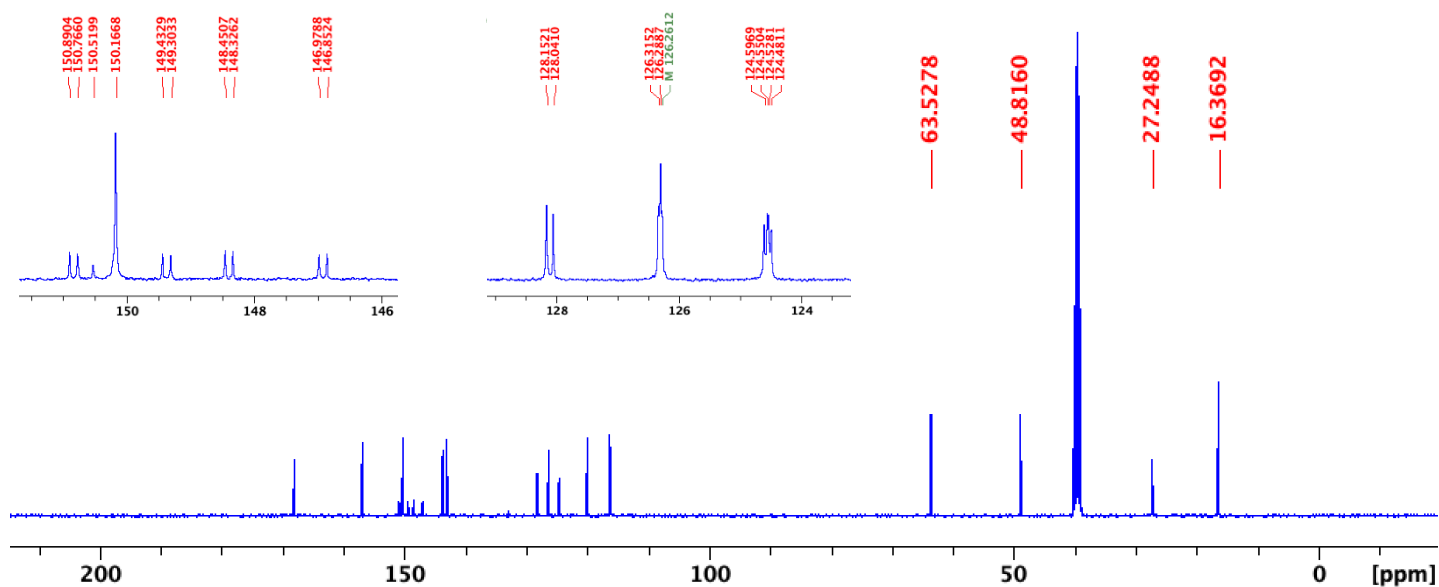

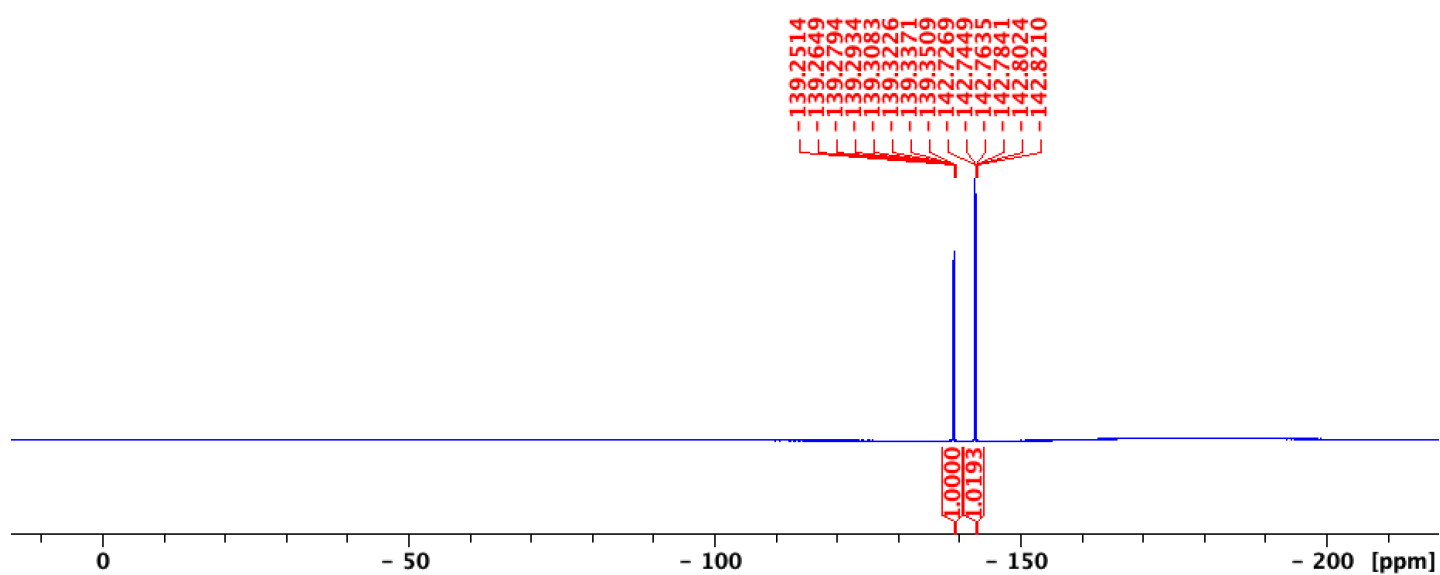

**(2R)-2-[(6-Imidazolyl-2-(2,3-difluorobenzylmercapto)-pyrido[3,4-d]pyrimidine-4-yl)amino]propanol (16b)**

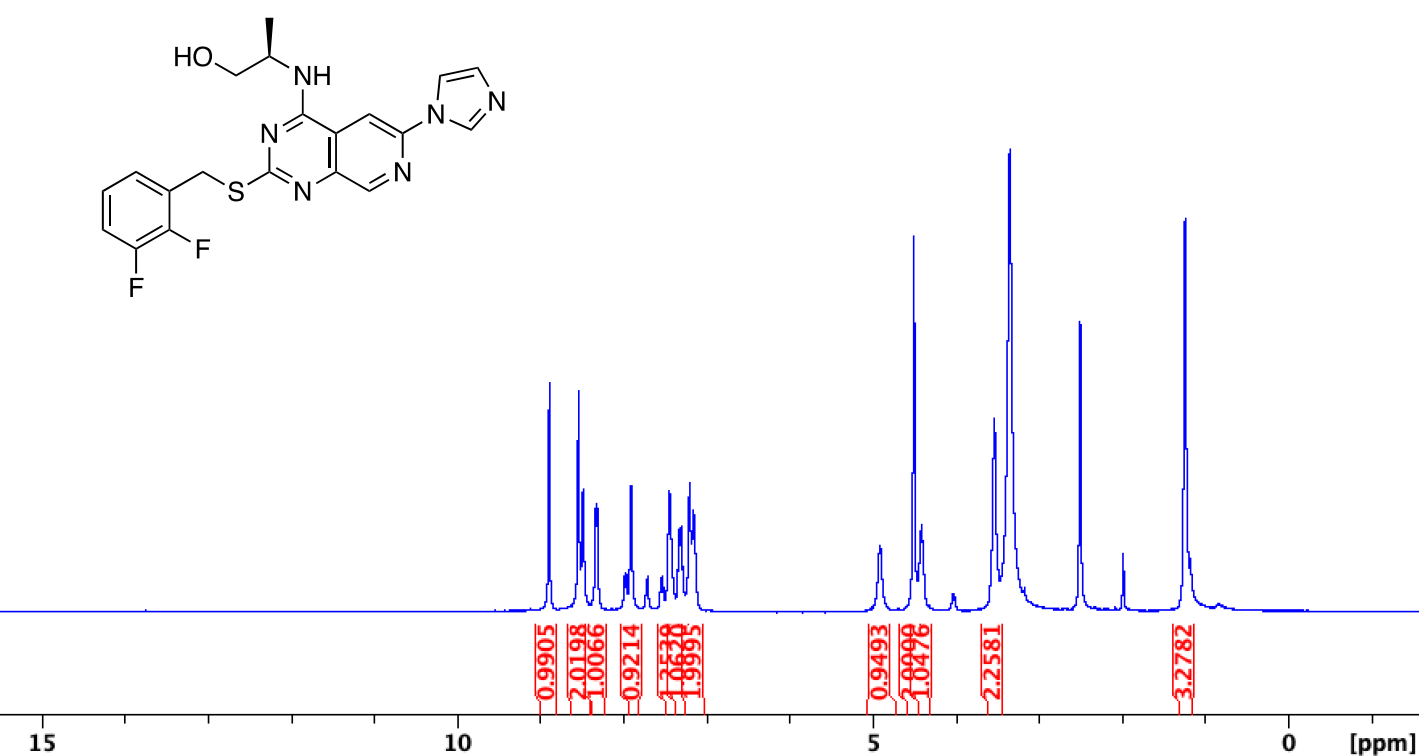

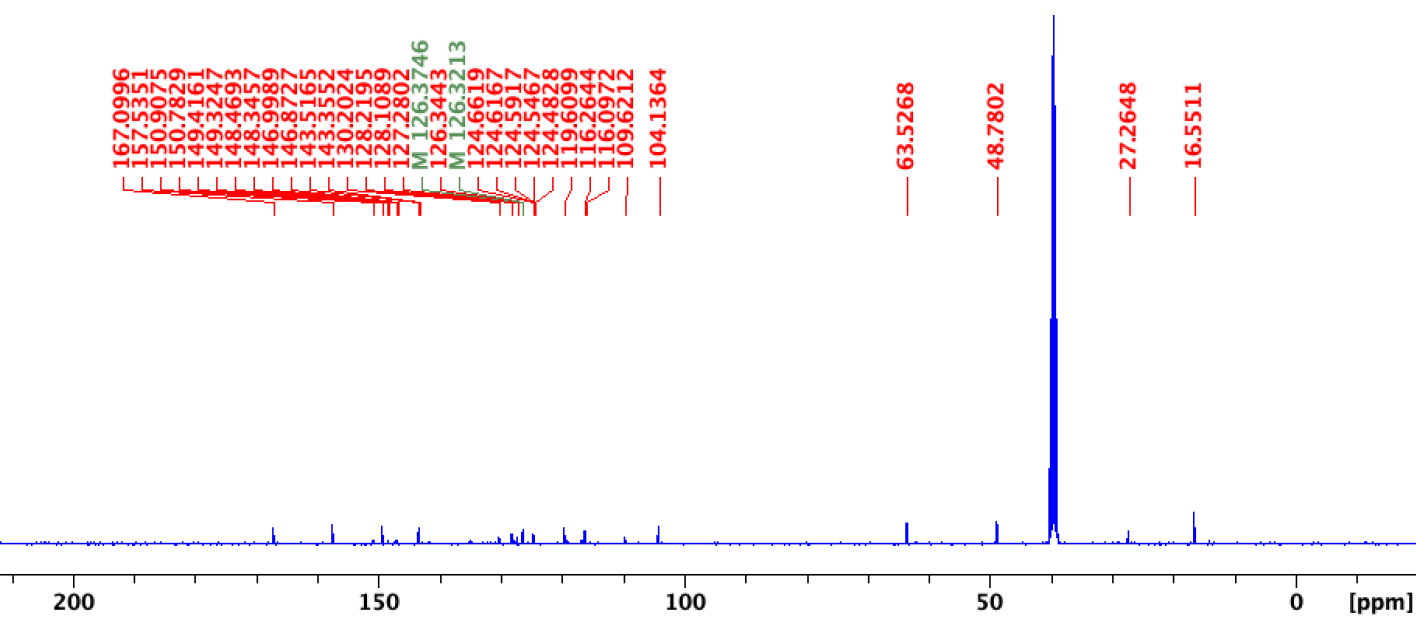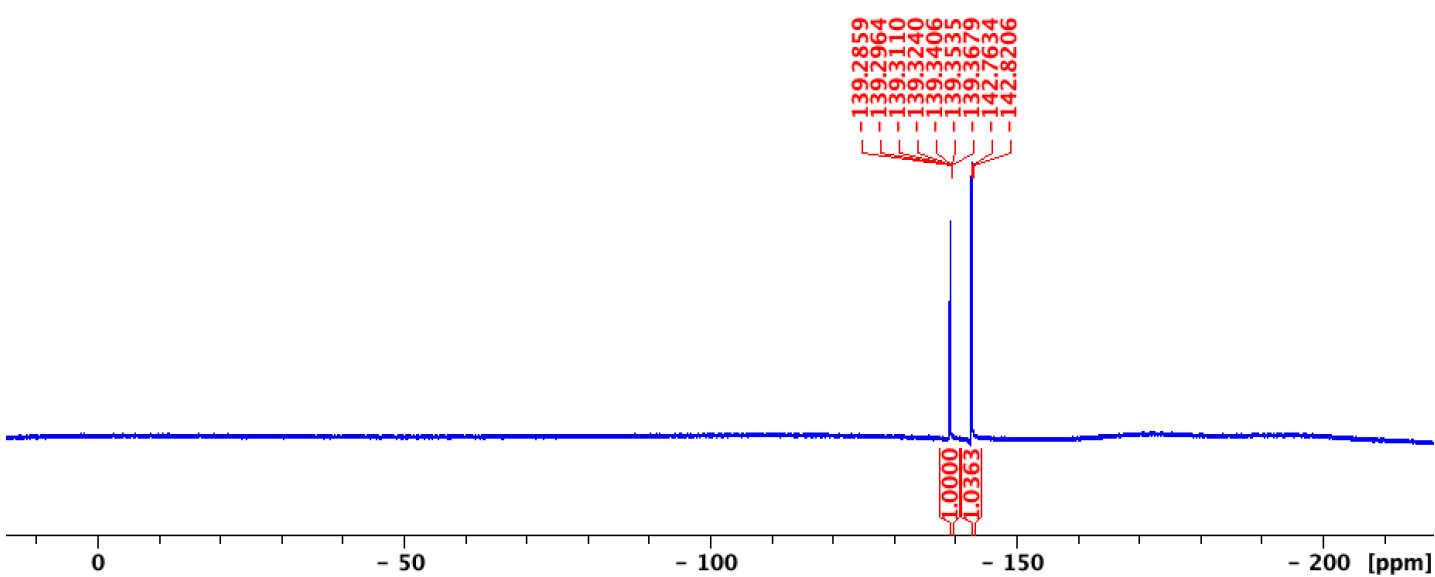

(2*R*)-2-[(2-(2,3-Difluorobenzylmercapto)-6-phenyl-pyrido[3,4-*d*]pyrimidine-4-yl)amino]propanol (17a)

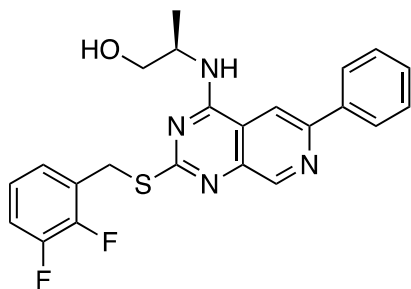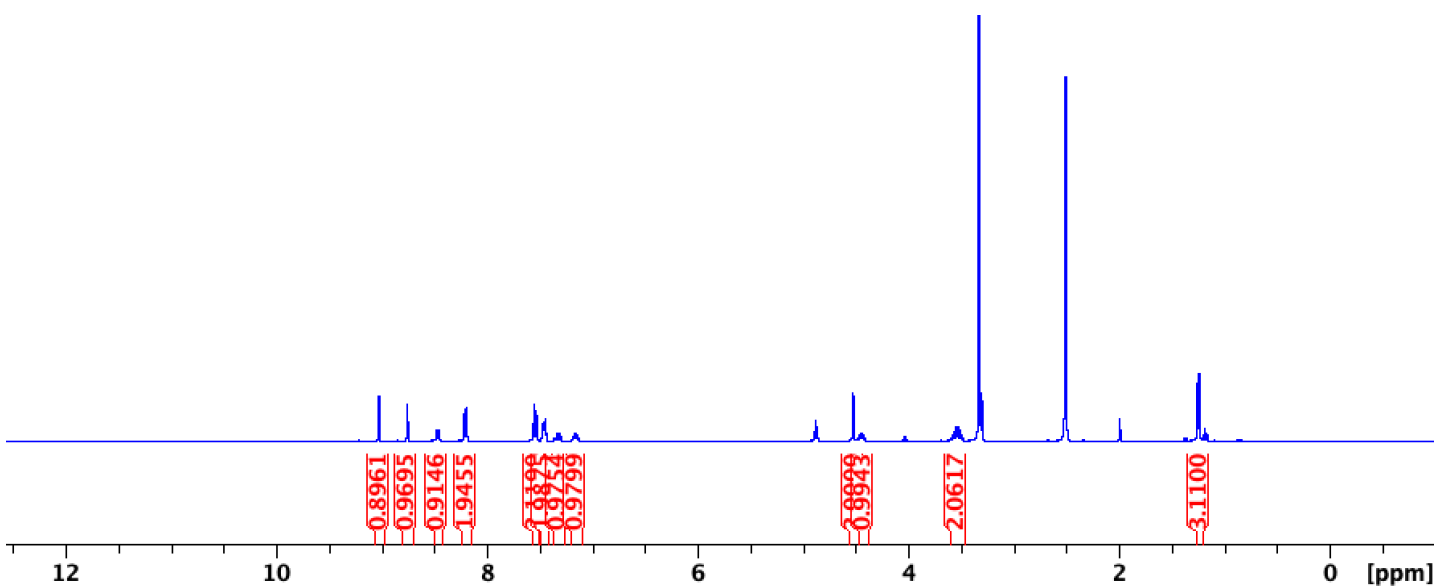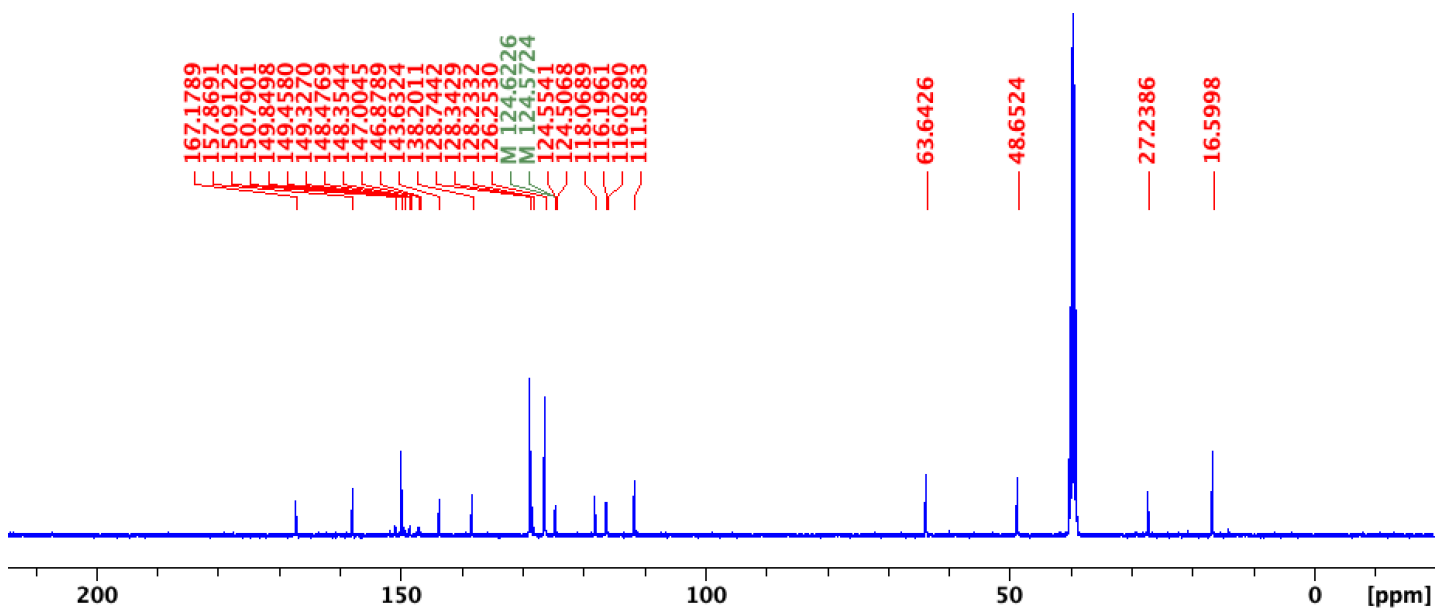

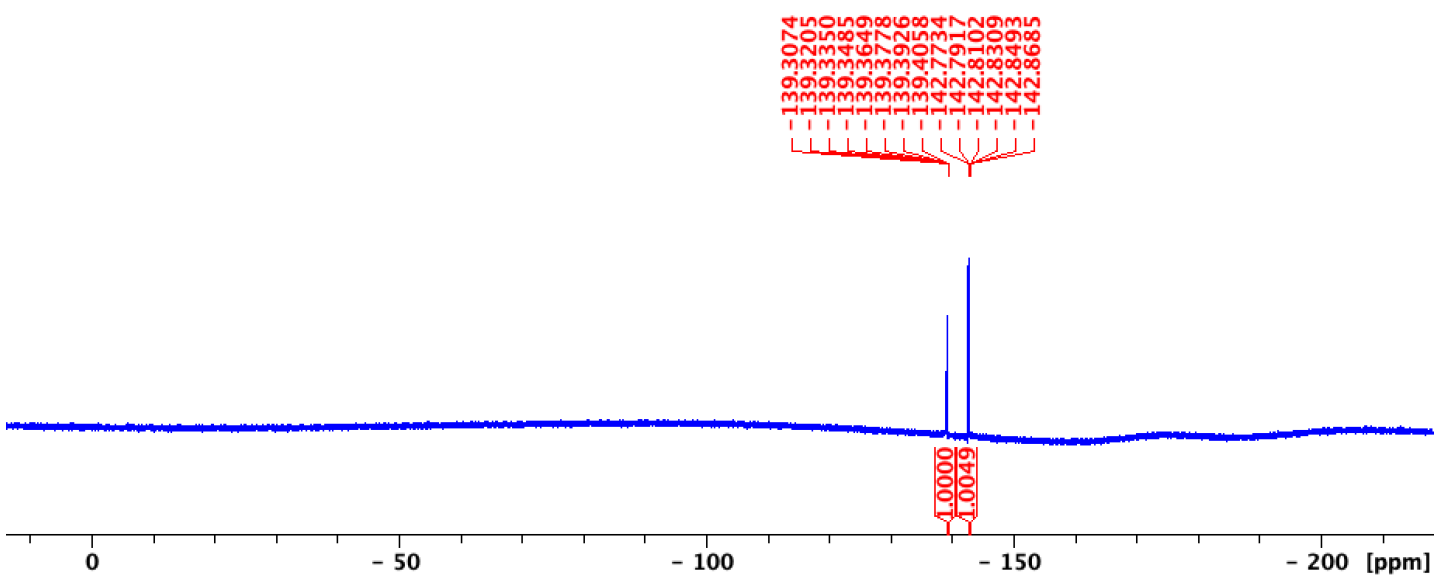



(2*R*)-2-[(2-(2,3-Difluorobenzylmercapto)-6-(2-furanyl)-pyrido[3,4-*d*]pyrimidine-4-yl)amino]propanol (17b)

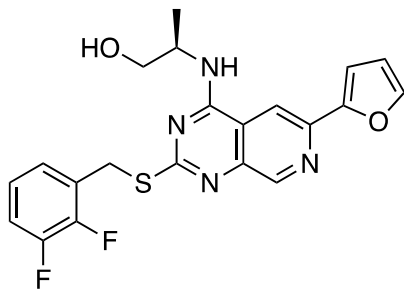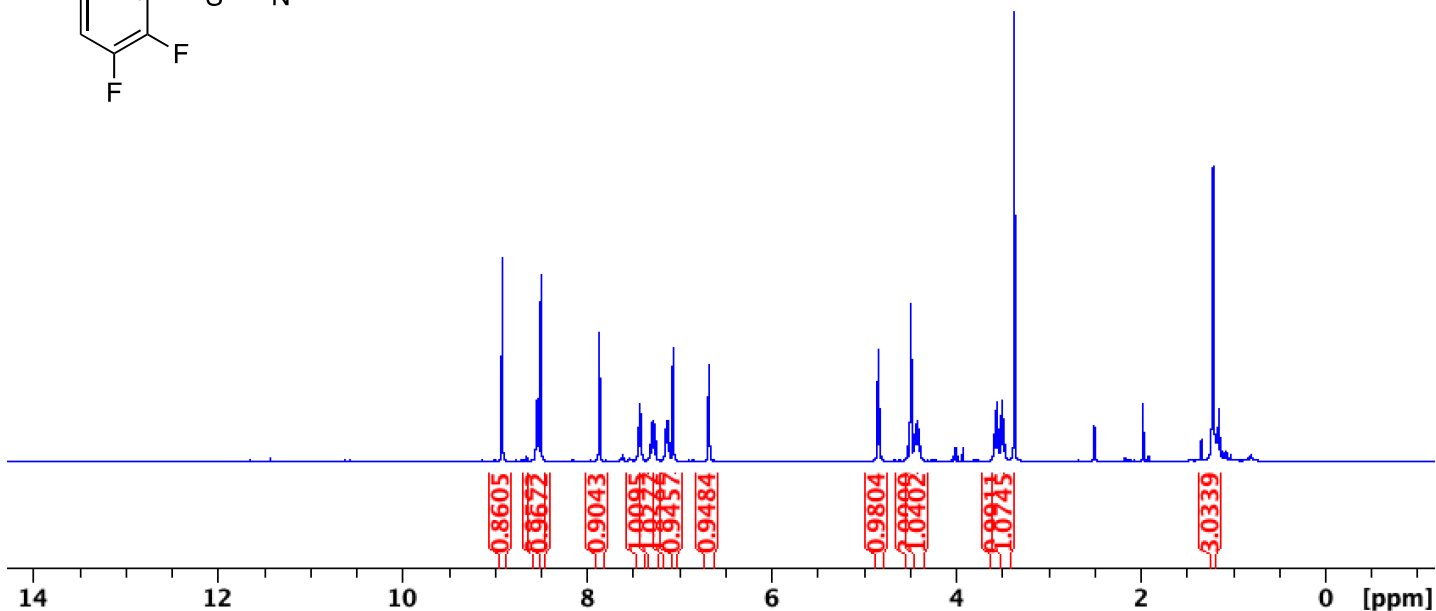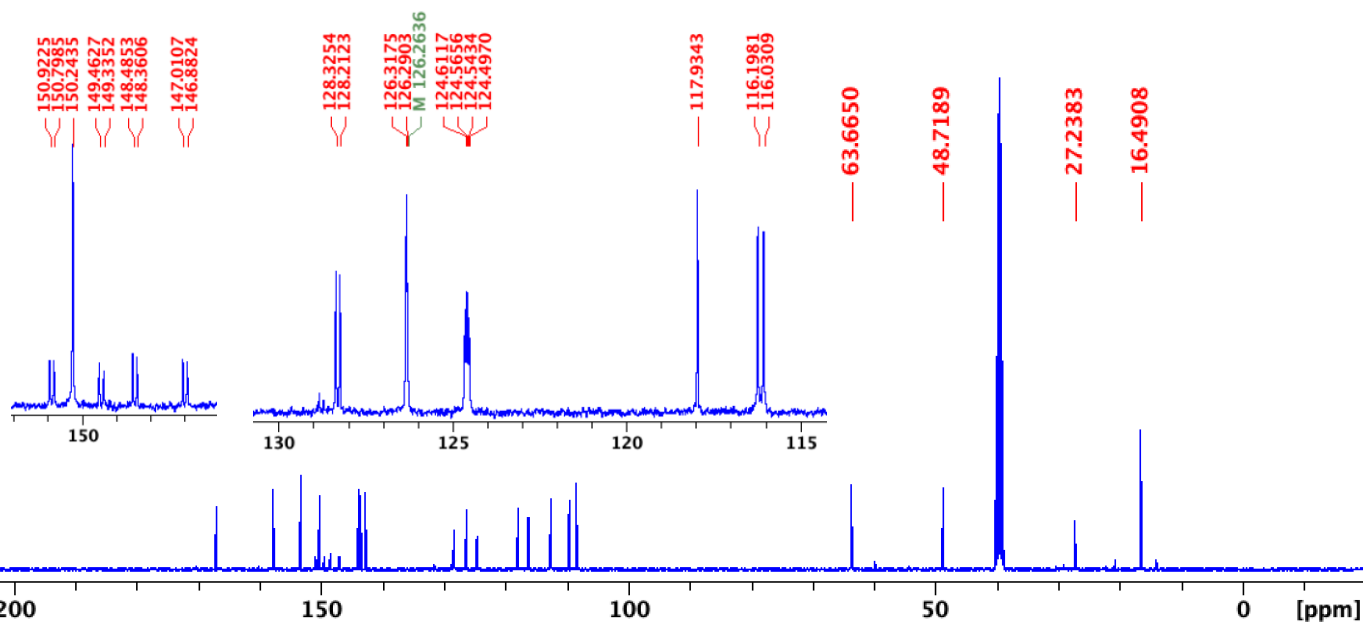

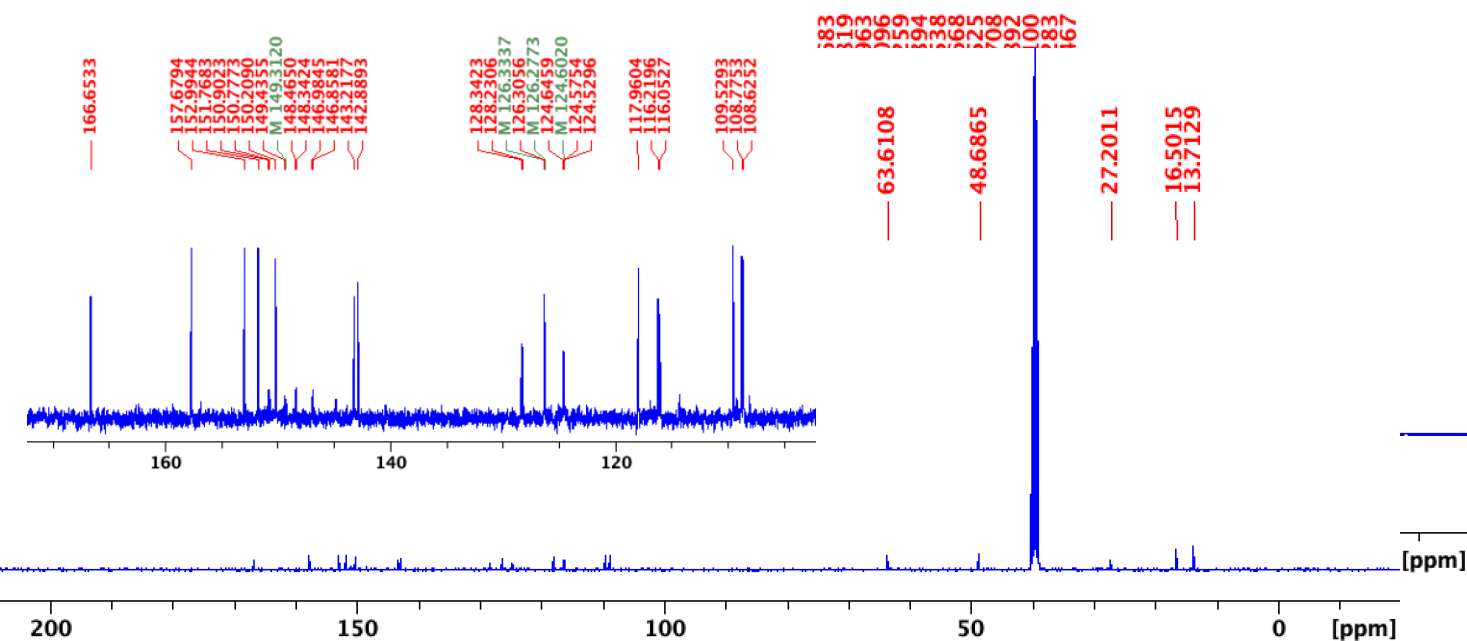

(2*R*)-2-[(2-(2,3-Difluorobenzylmercapto)-6-(2-thienyl)-pyrido[3,4-*d*]pyrimidine-4-yl)amino]propanol (17d)

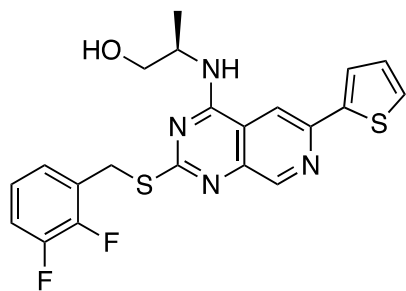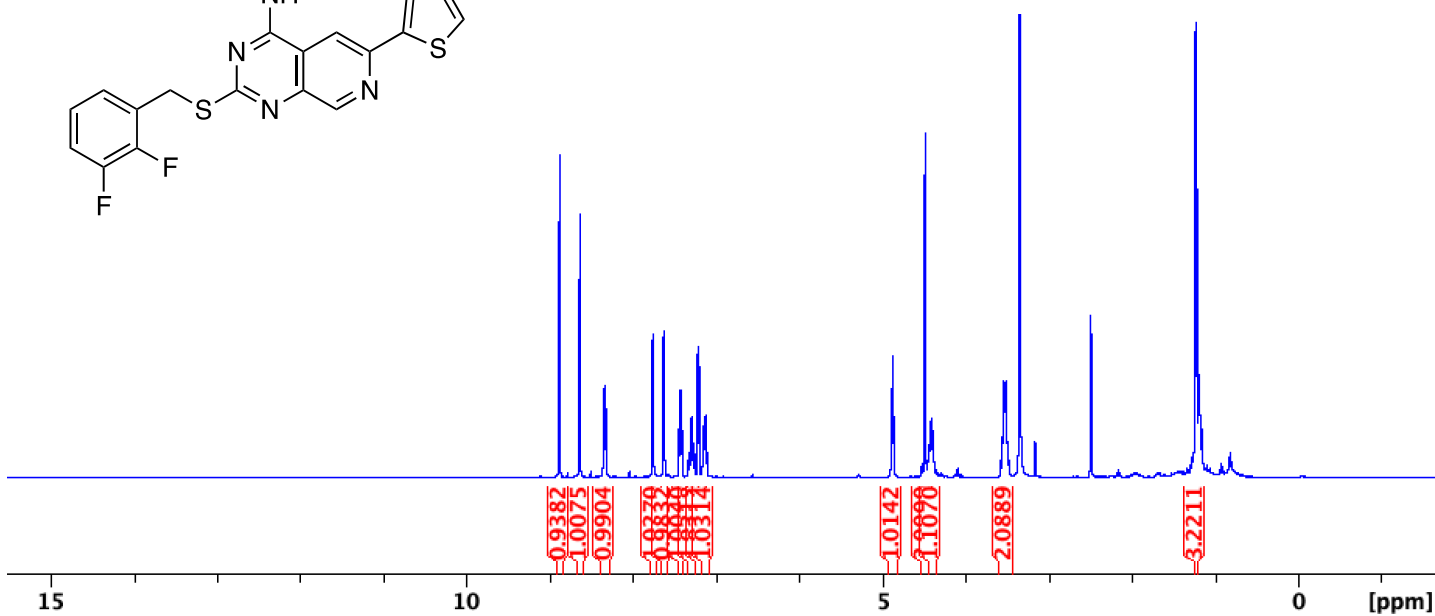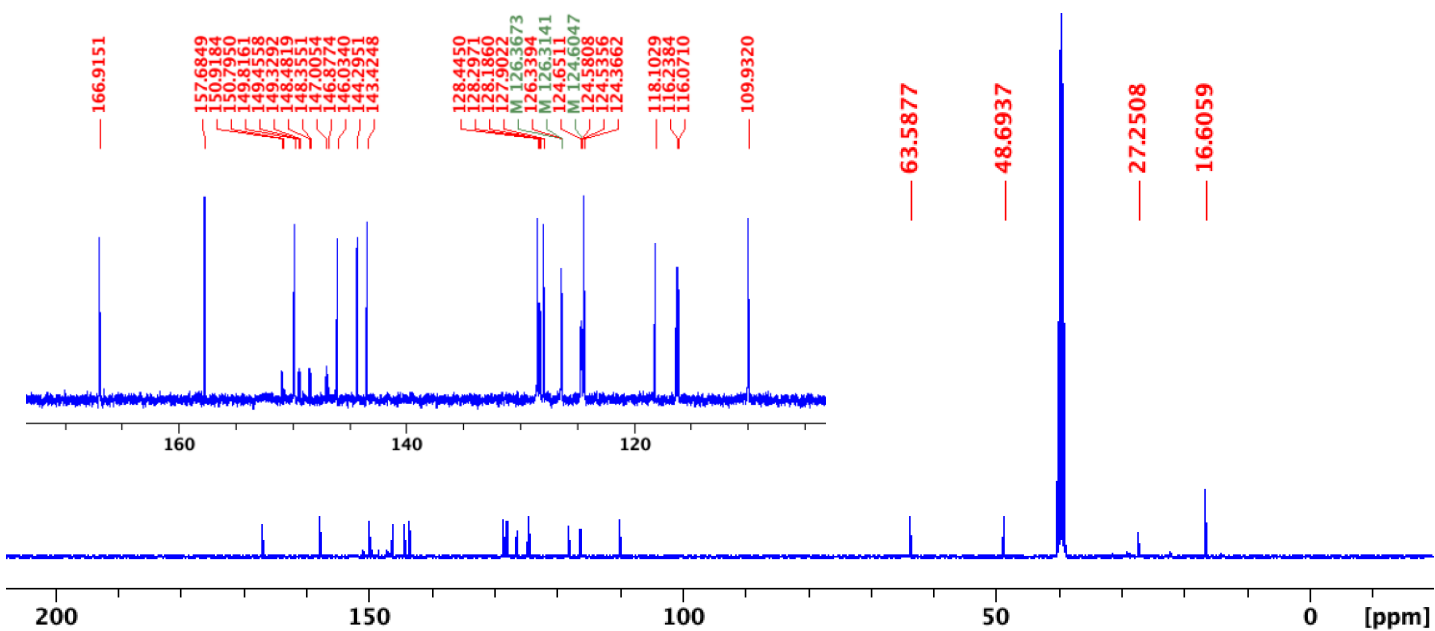

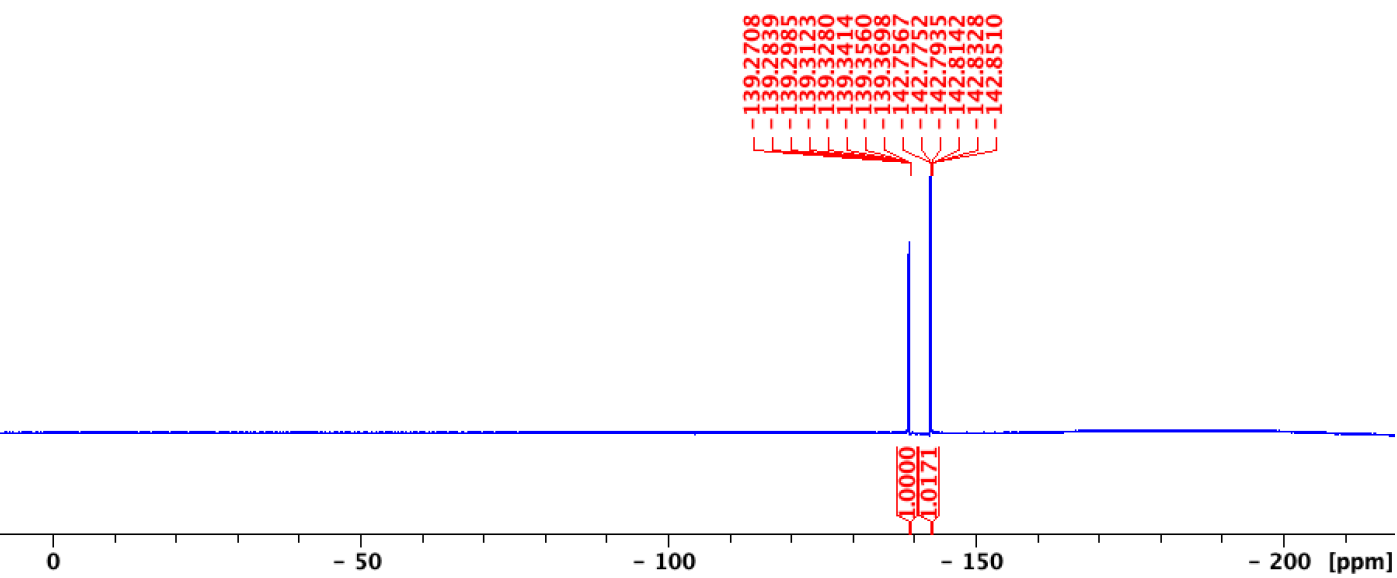

6-Chloro-2-(2,3-difluorobenzylmercapto)-4-(4-methoxybenzyl)-pyrido[3,4-*d*]pyrimidine (18)

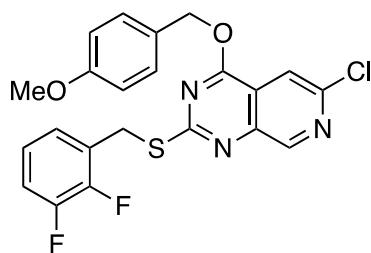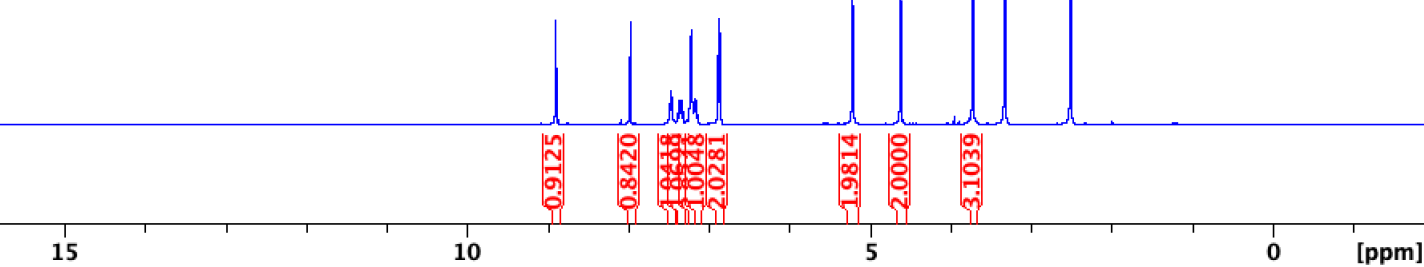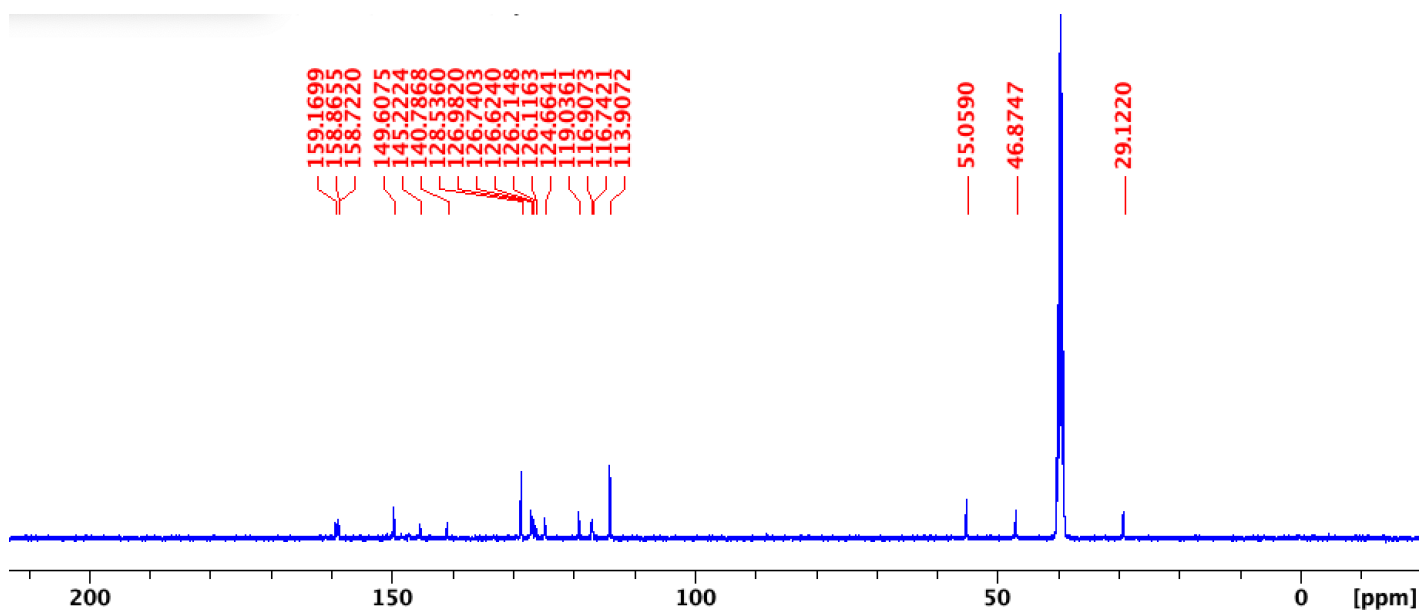

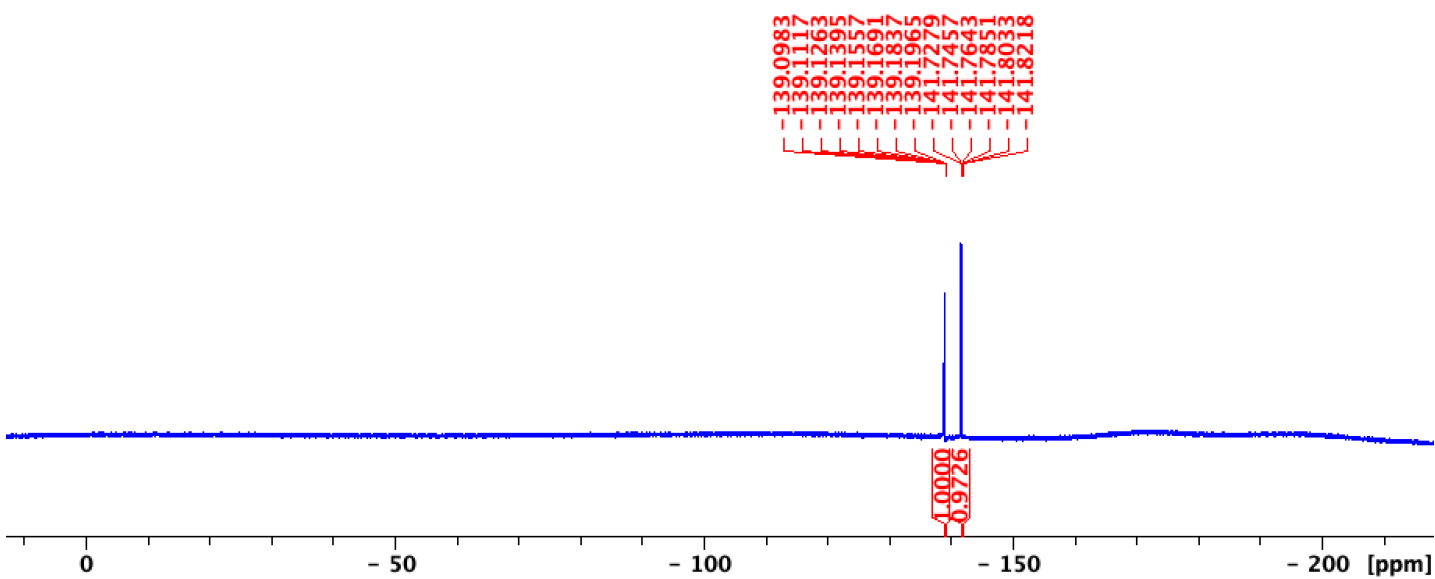

2-(2,3-Difluorobenzylmercapto)-4-(4-methoxybenzyl)-(N-diphenylmethylene)-pyrido[3,4-*d*]pyrimidine-6-amine (19)

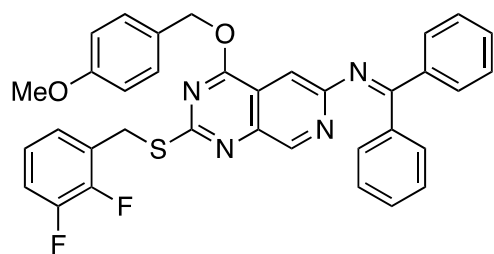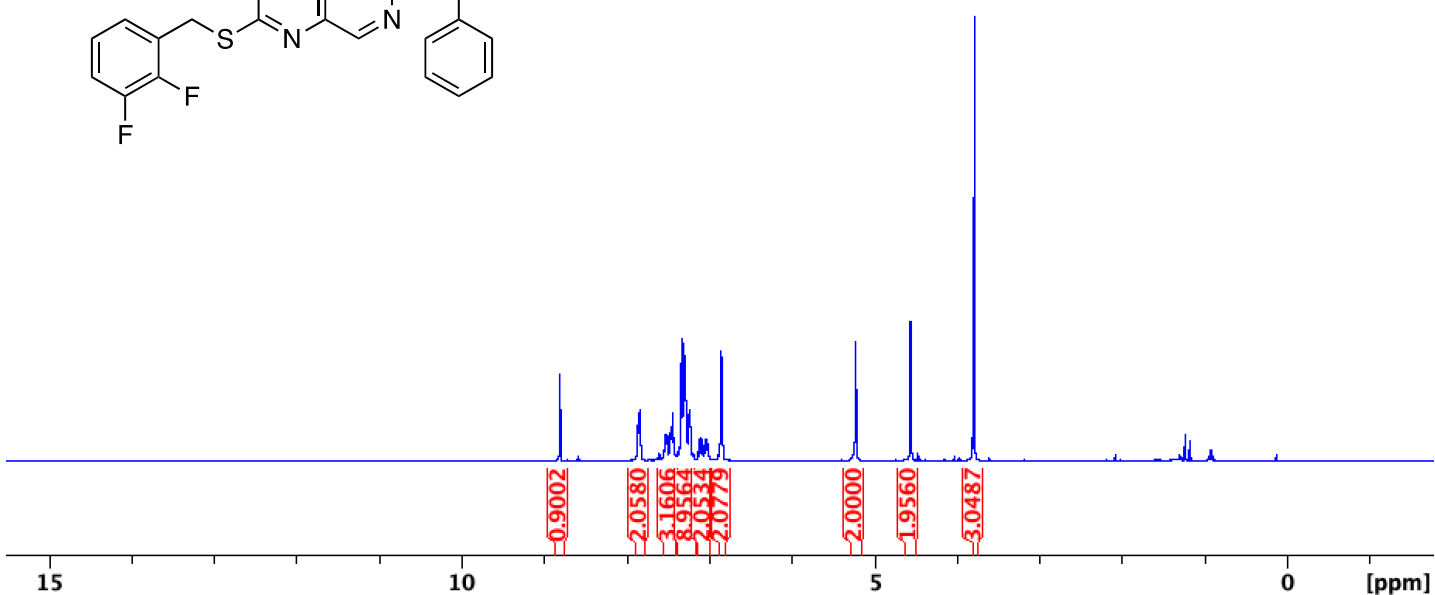

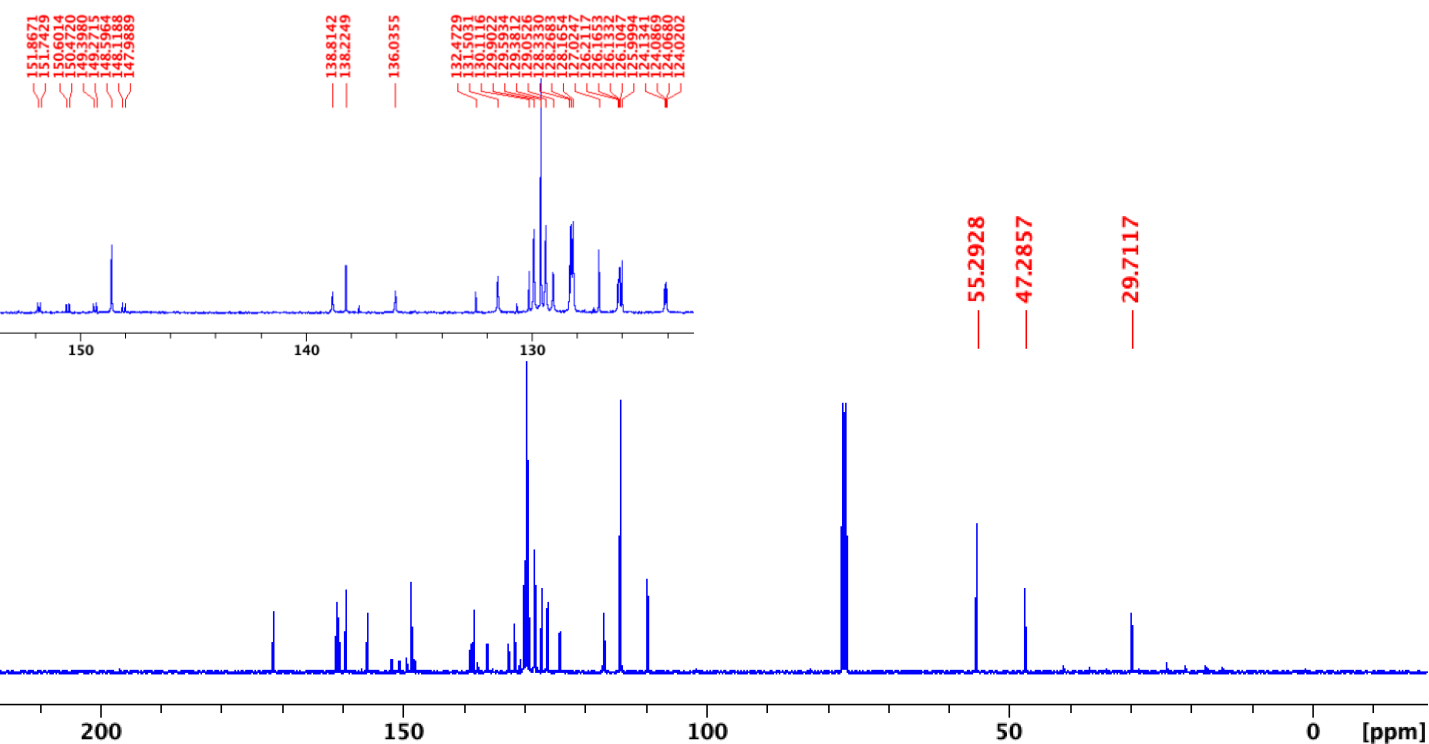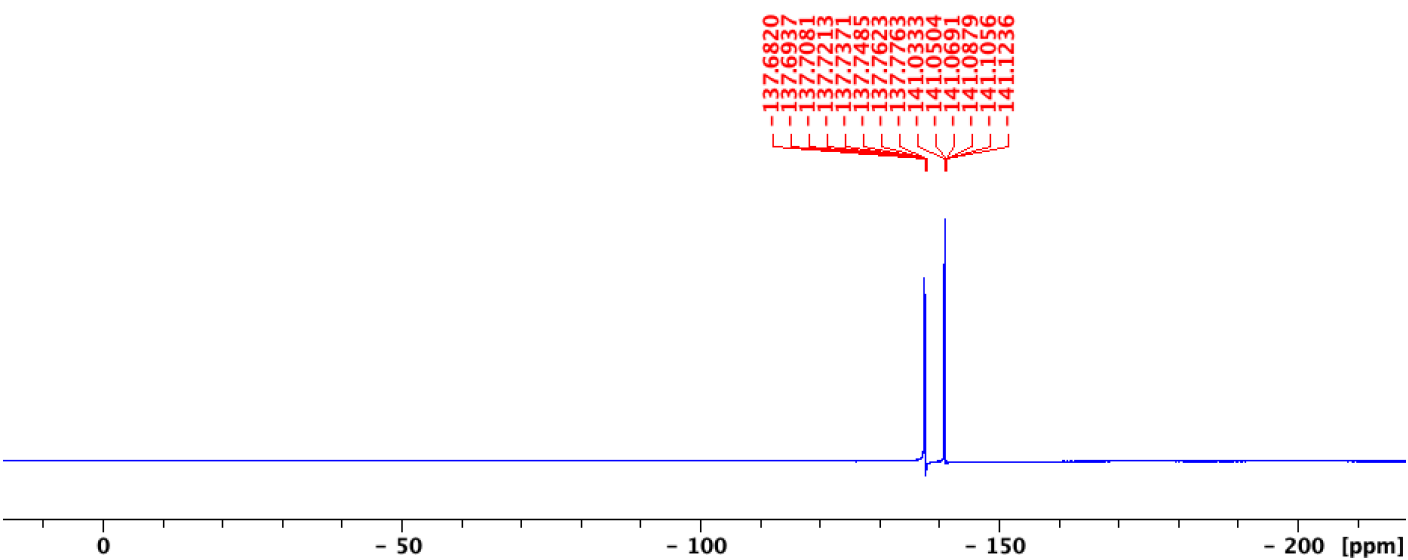

(2*R*)-2-[[6-Amino-2-(2,3-difluorobenzylmercapto)-pyrido[3,4-*d*]pyrimidine-4-yl]amino]propanol (21)

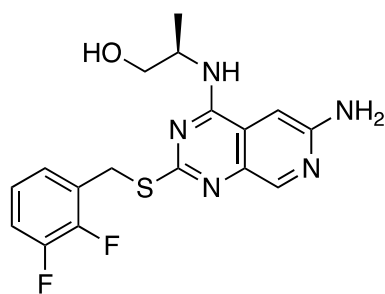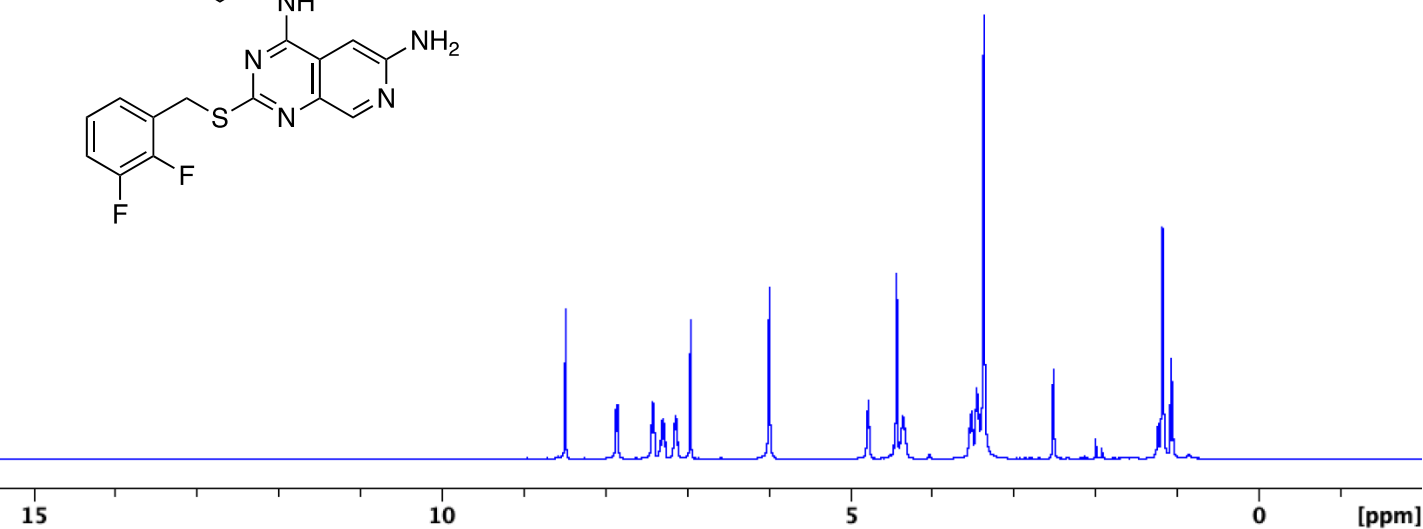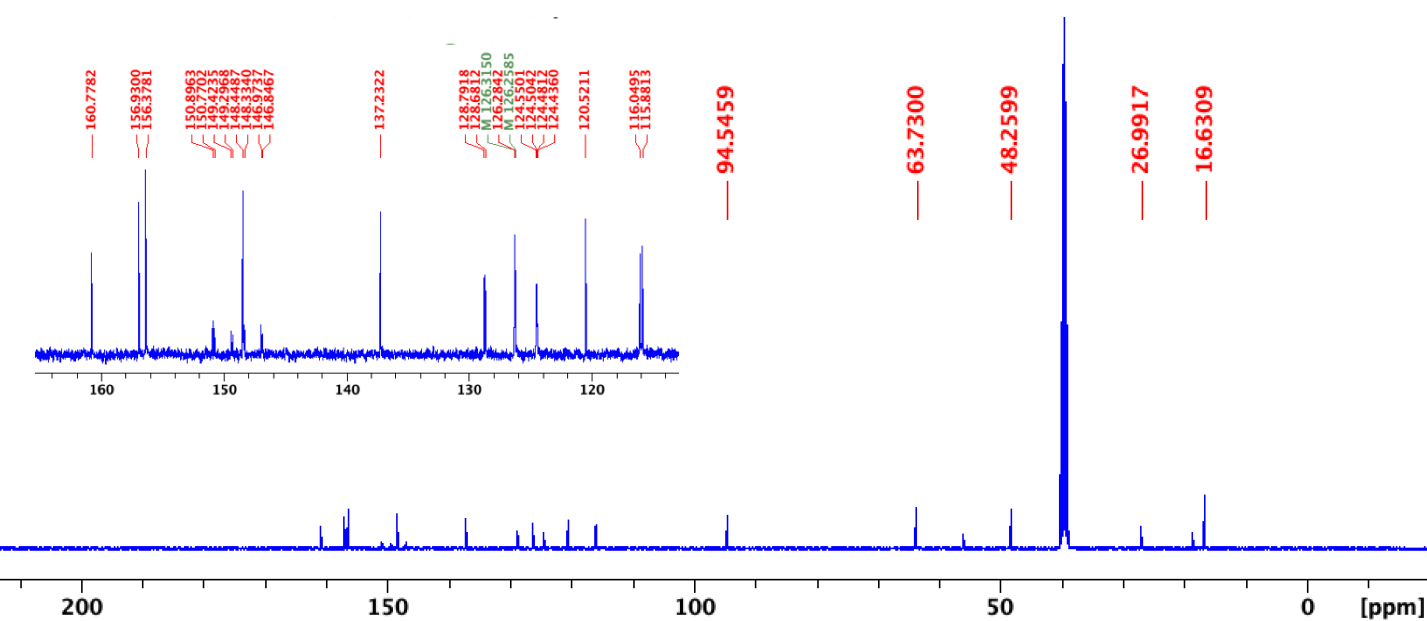

(2*R*)-2-[[6-Chloro-2-pyrido[3,4-*d*]pyrimidine-4-yl]amino]butanol (23a)



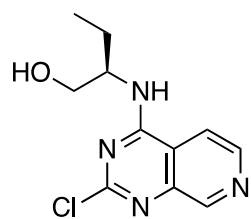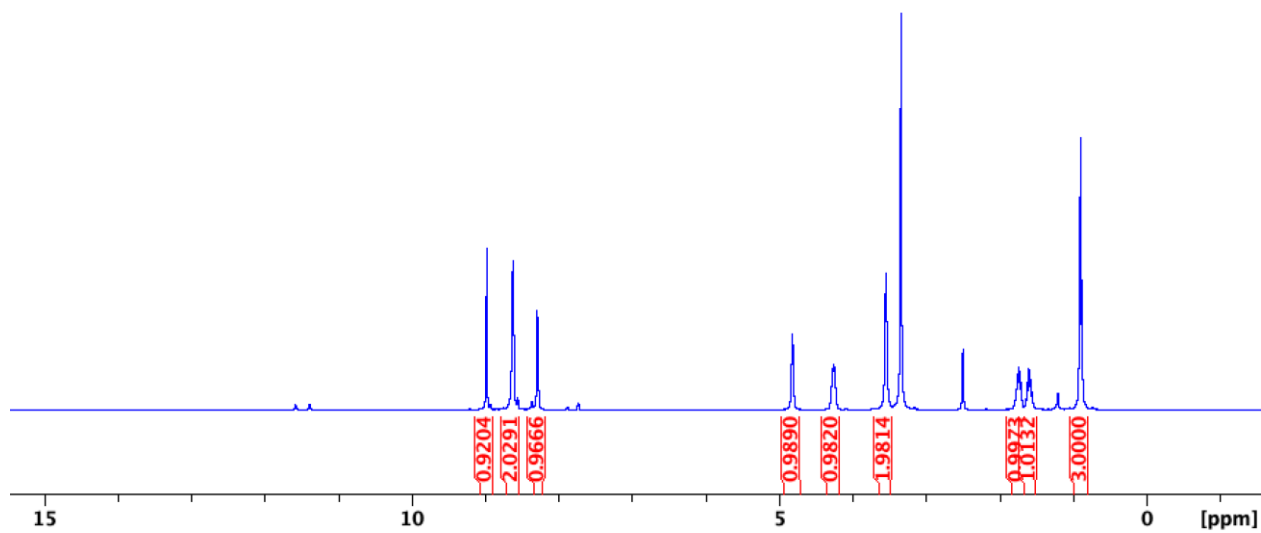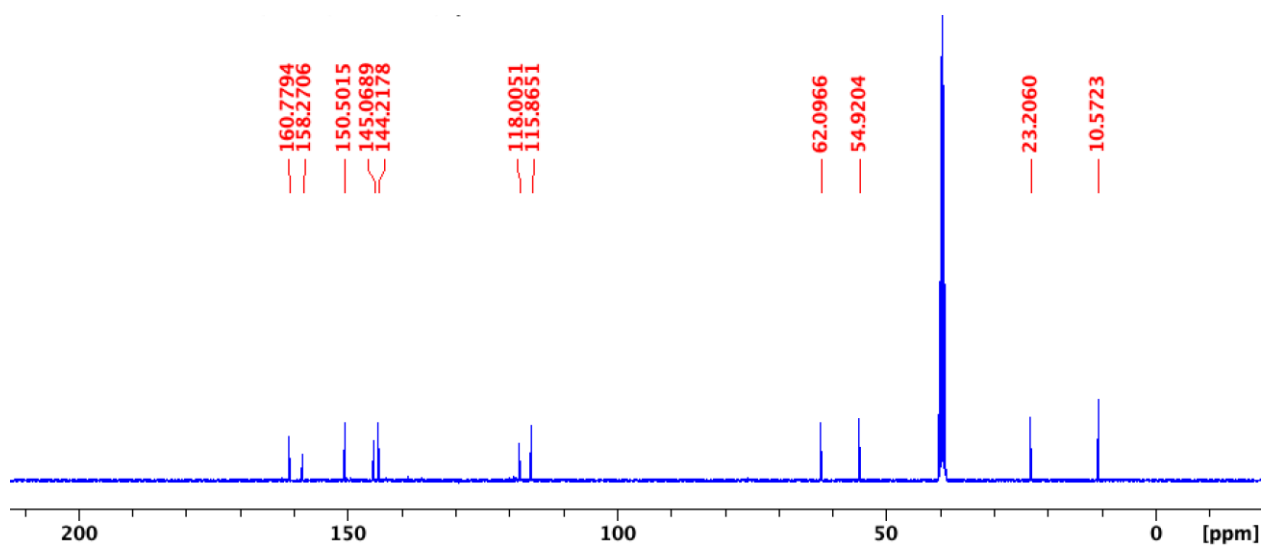

2-[(2-Chloro-pyrido[3,4-*d*]pyrimidine-4-yl)amino]-2-methyl-propan-1-ol (23b)

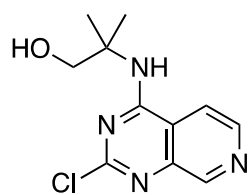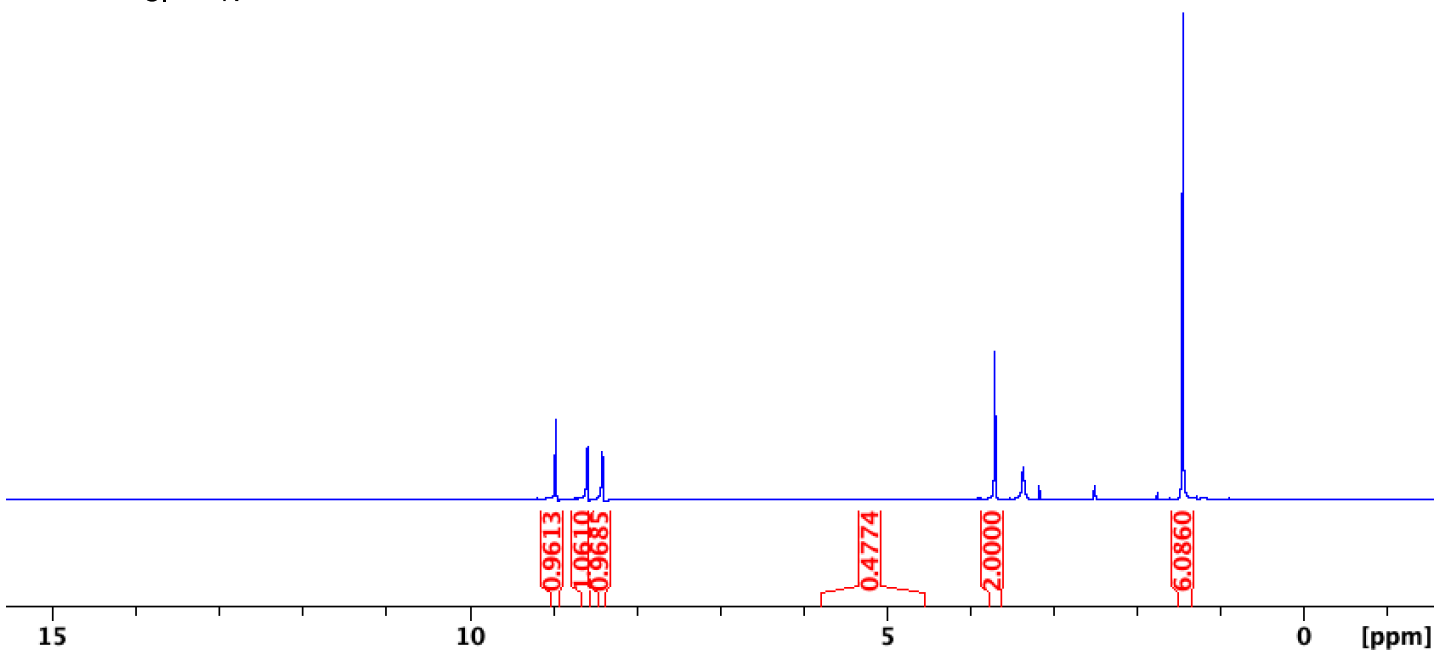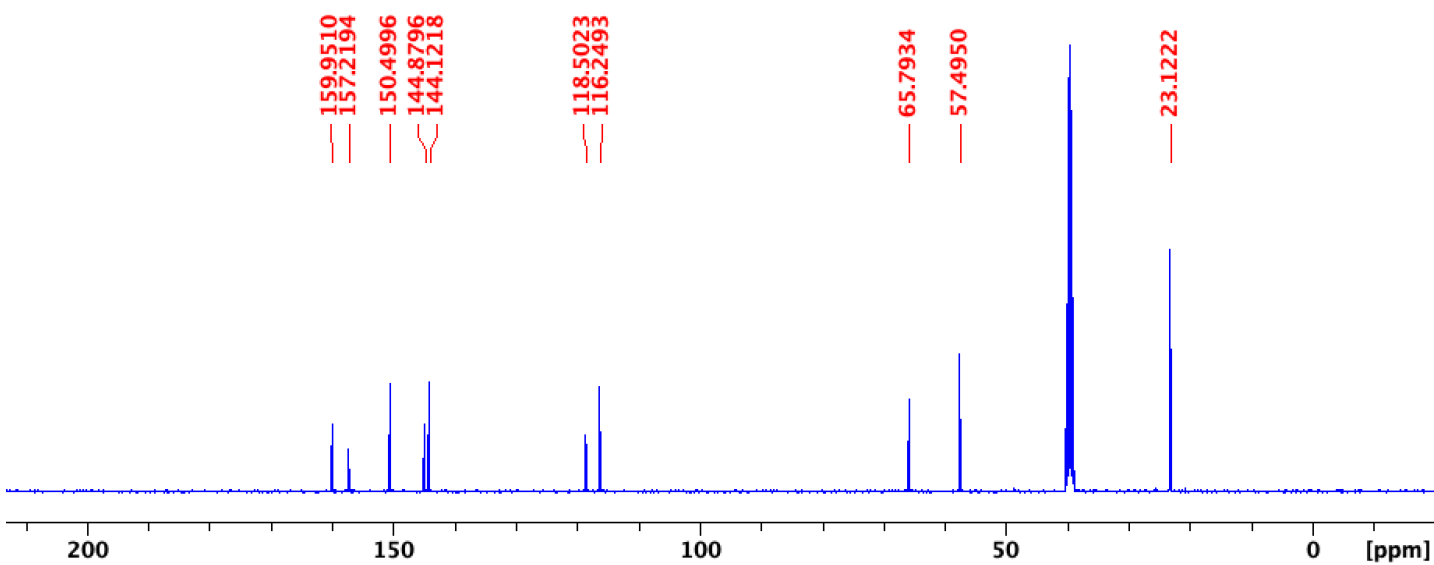

3-[(2-Chloro-pyrido[3,4-*d*]pyrimidine-4-yl)amino]propan-1,2-diol (23c)

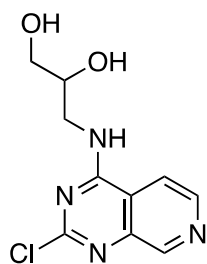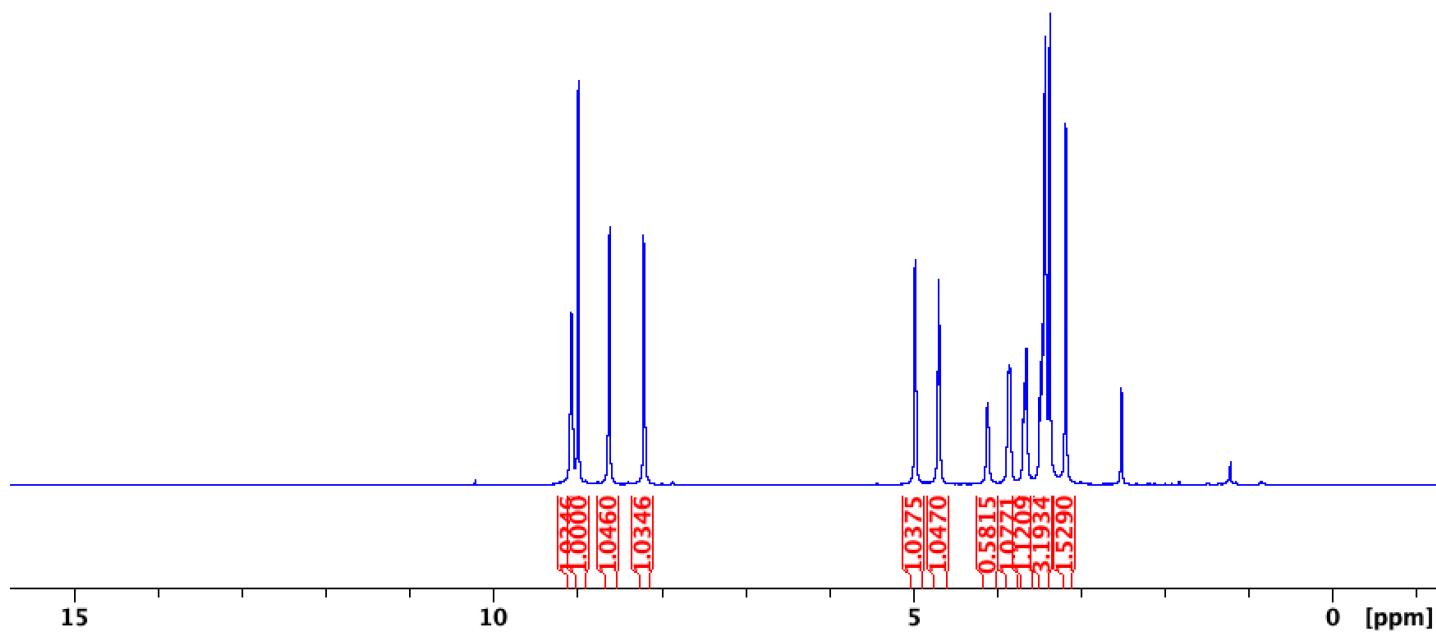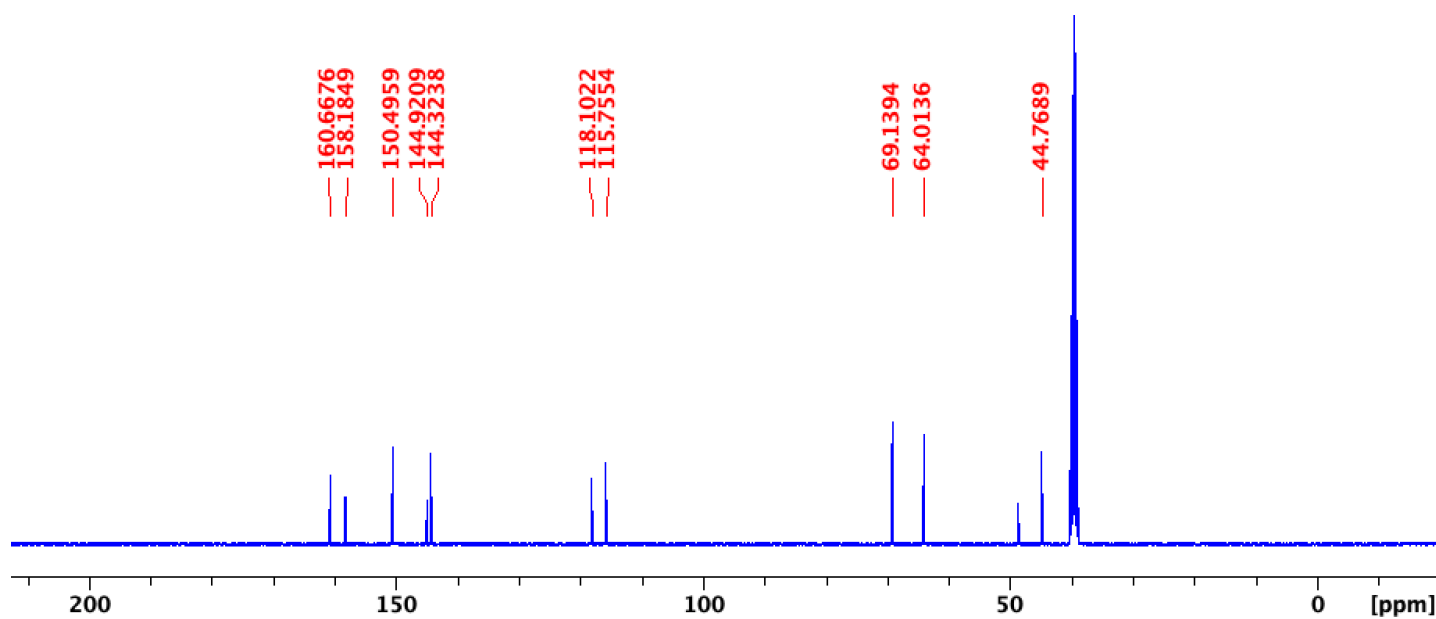

2-[(2-Chloro-pyrido[3,4-*d*]pyrimidine-4-yl)amino]ethanol (23d)

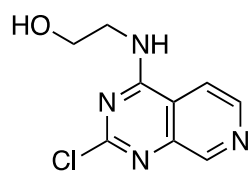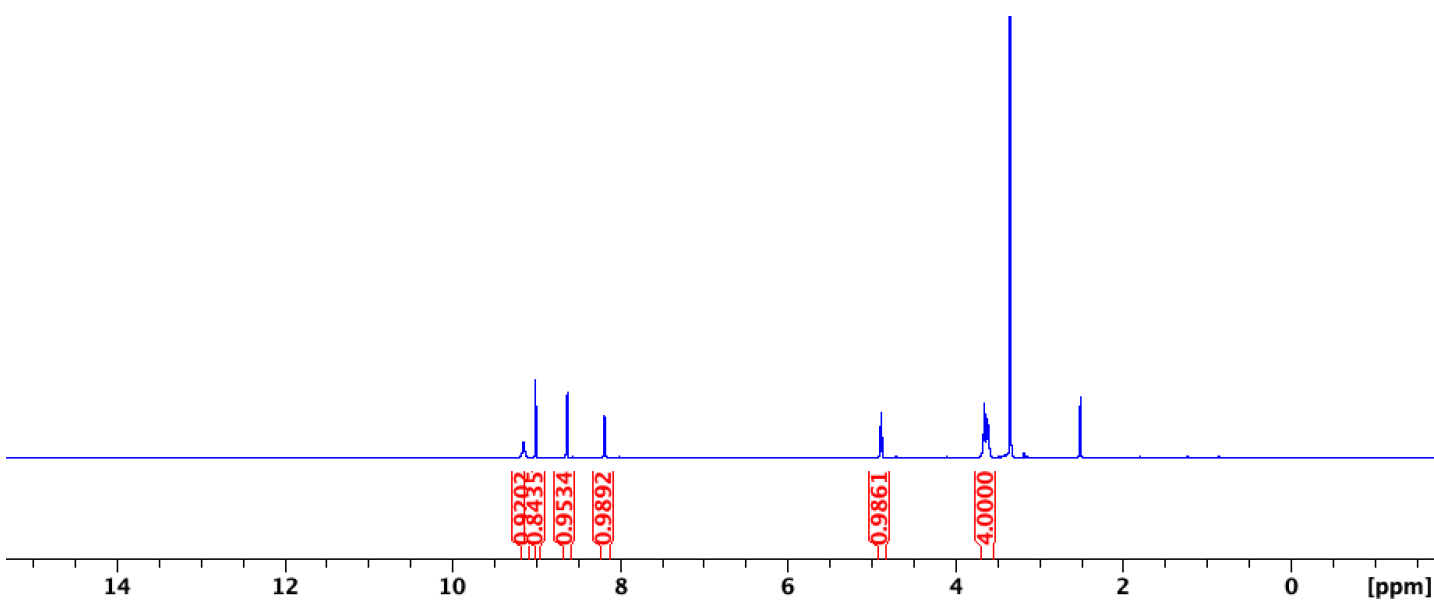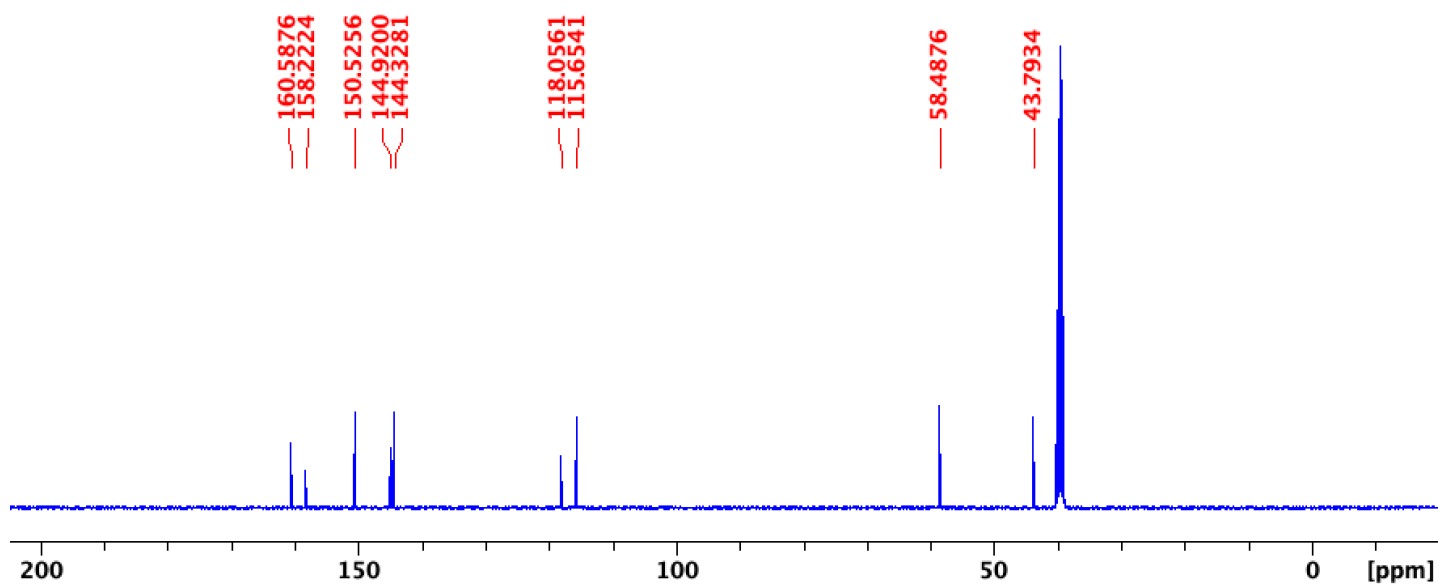

3-[(2-(2,3-Difluorobenzylmercapto)-pyrido[3,4-*d*]pyrimidine-4-yl)oxy]ethanol (23e)

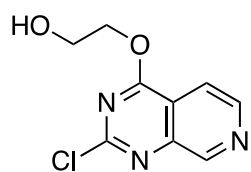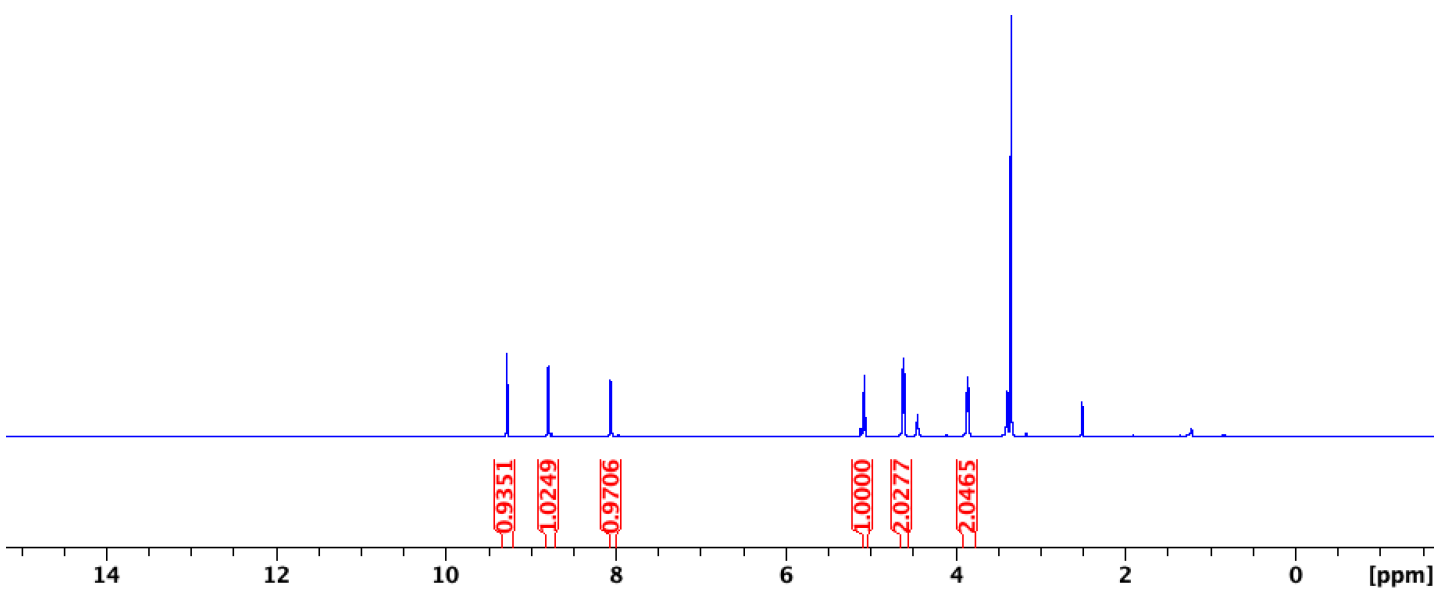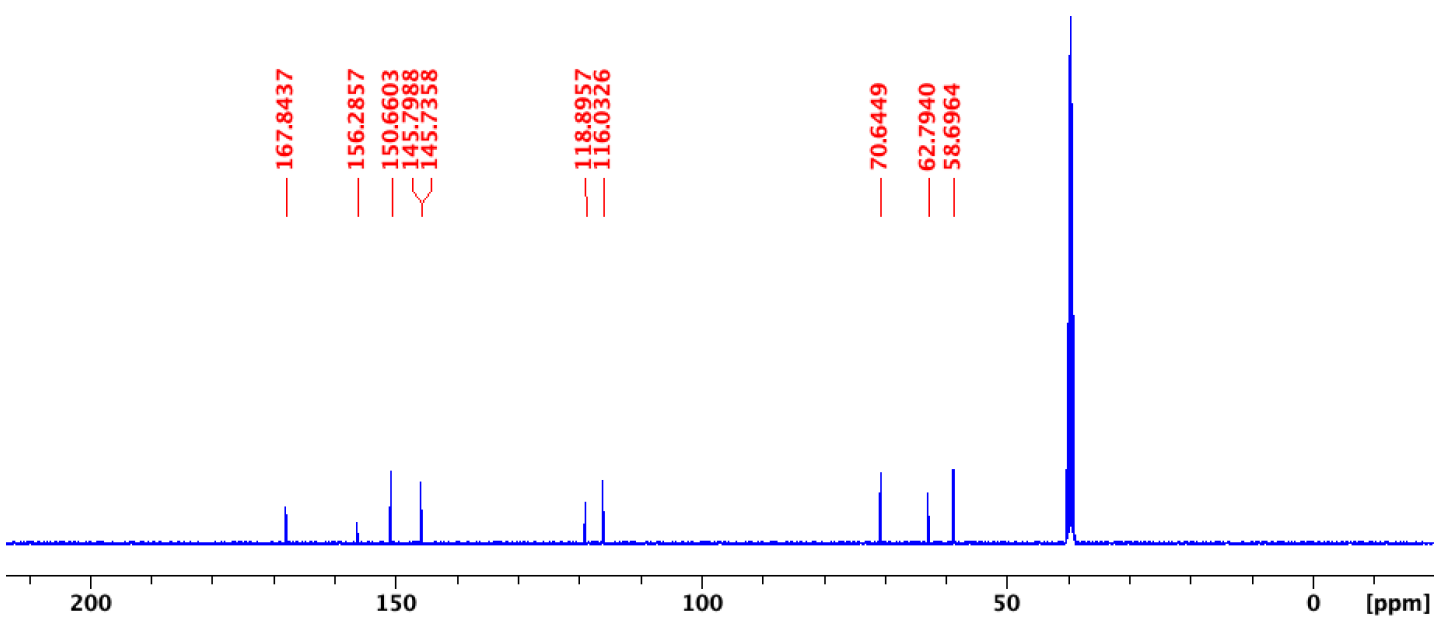

(2R)-2-[(2-(2,3-Difluorobenzylmercapto)-pyrido[3,4-d]pyrimidine-4-yl)amino]butanol (24a)

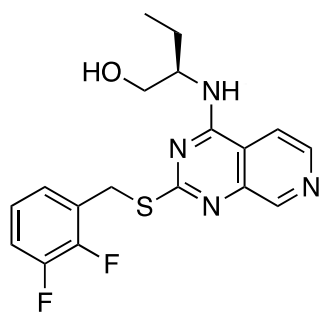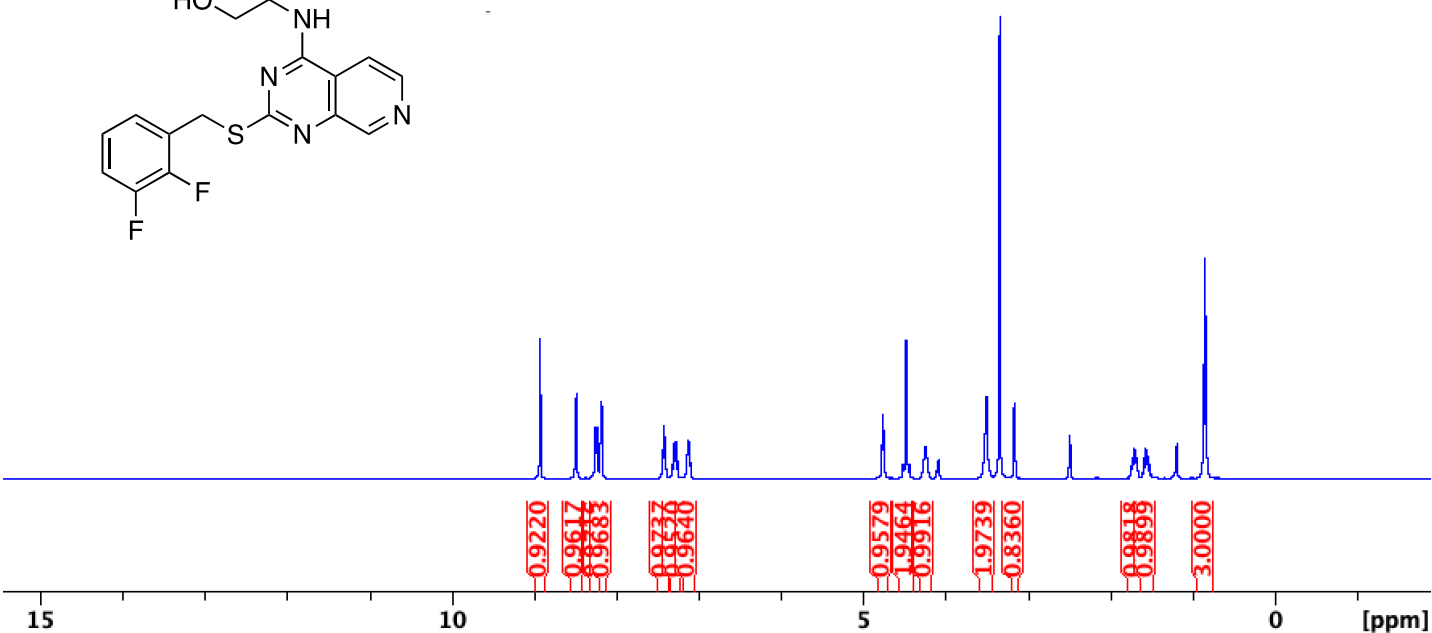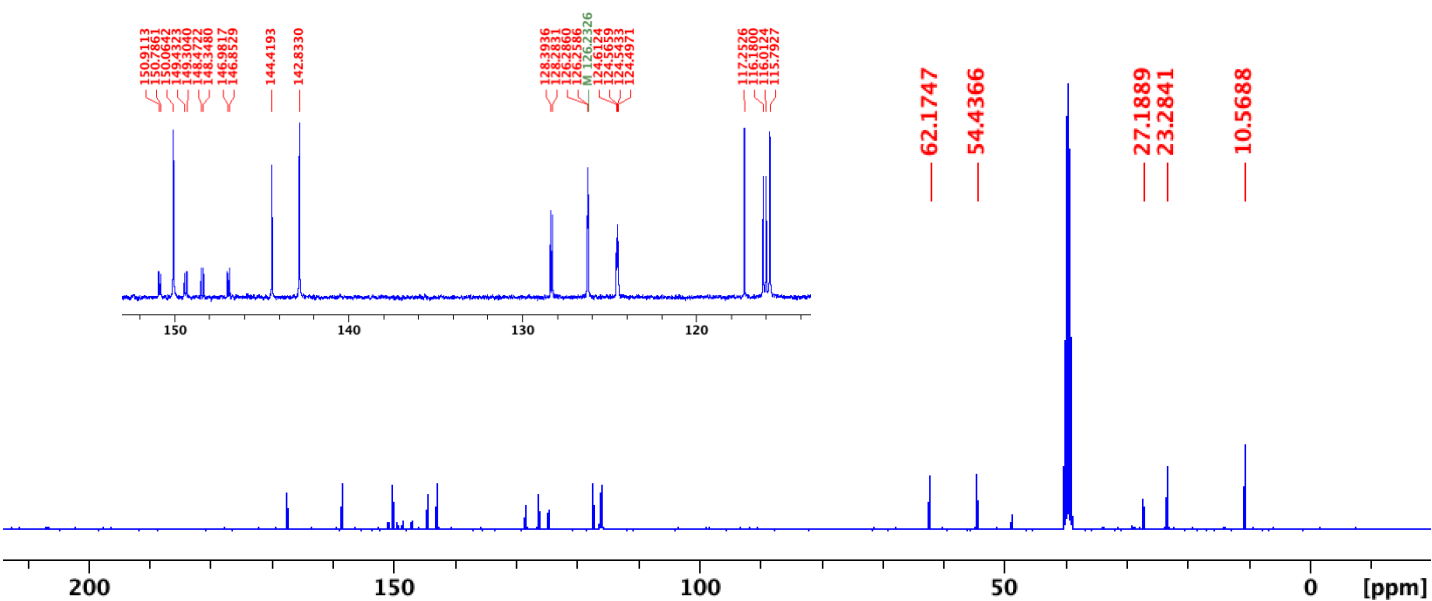

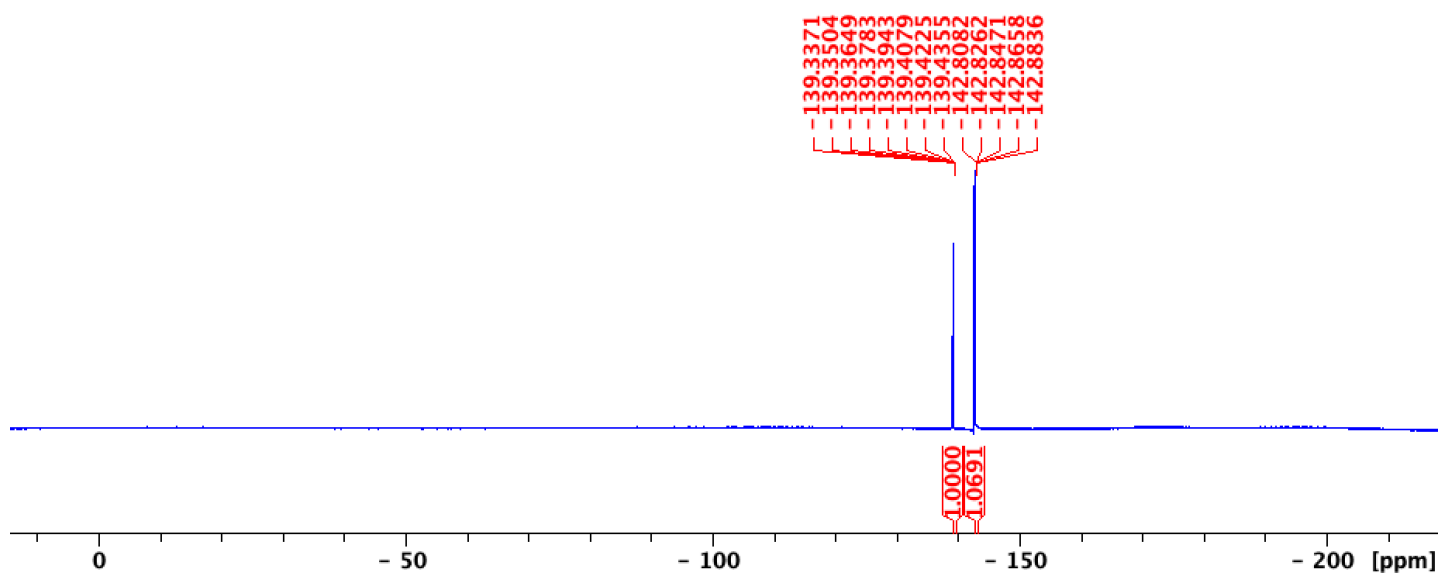

2-[(2-(2,3-Difluorobenzylmercapto)-pyrido[3,4-d]pyrimidine-4-yl)amino]-2-methyl-propan-1-ol (24b)

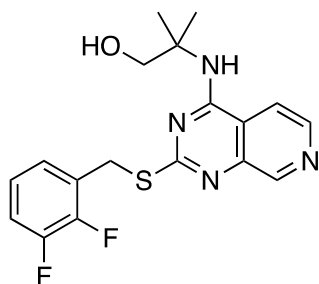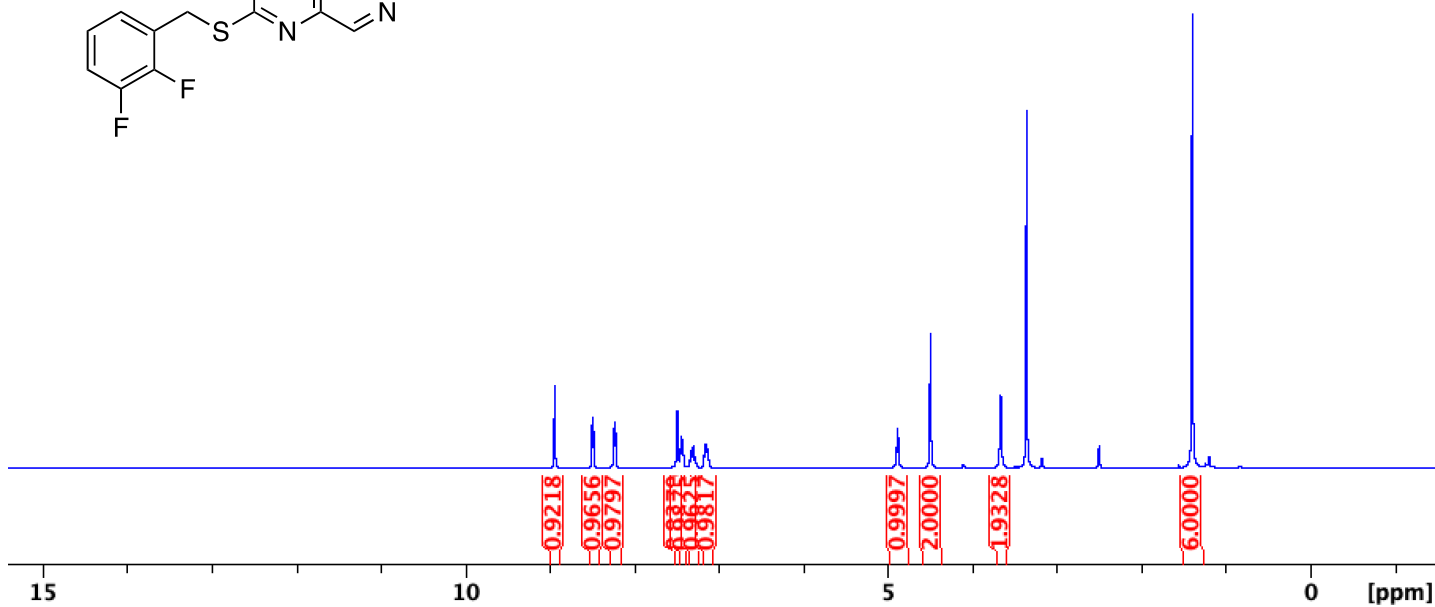

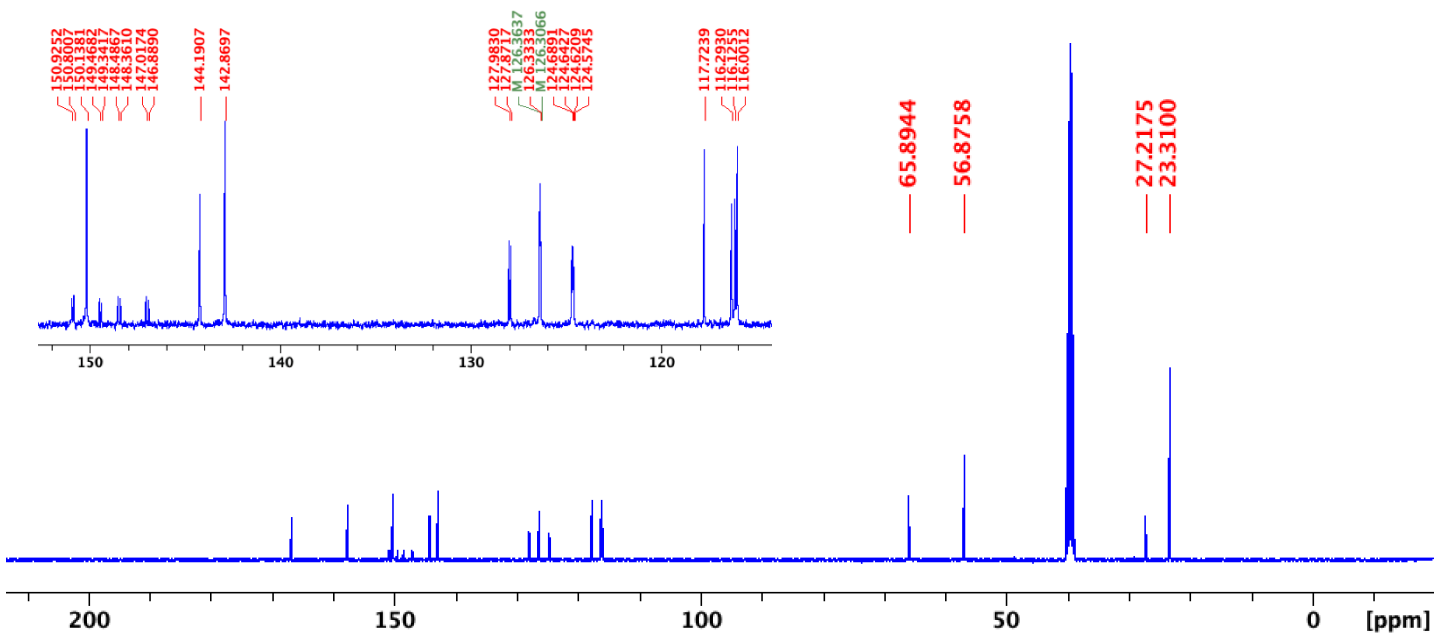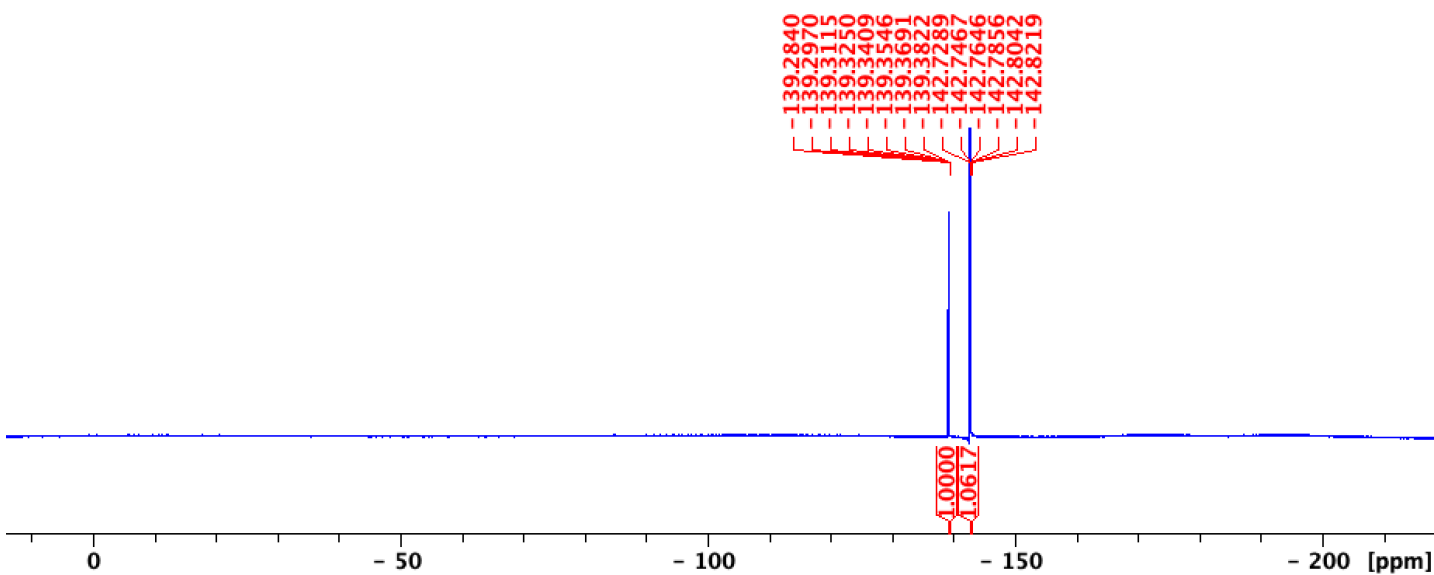



3-[(2-(2,3-Difluorobenzylmercapto)-pyrido[3,4-*d*]pyrimidine-4-yl)amino]propan-1,2-diol (24c)

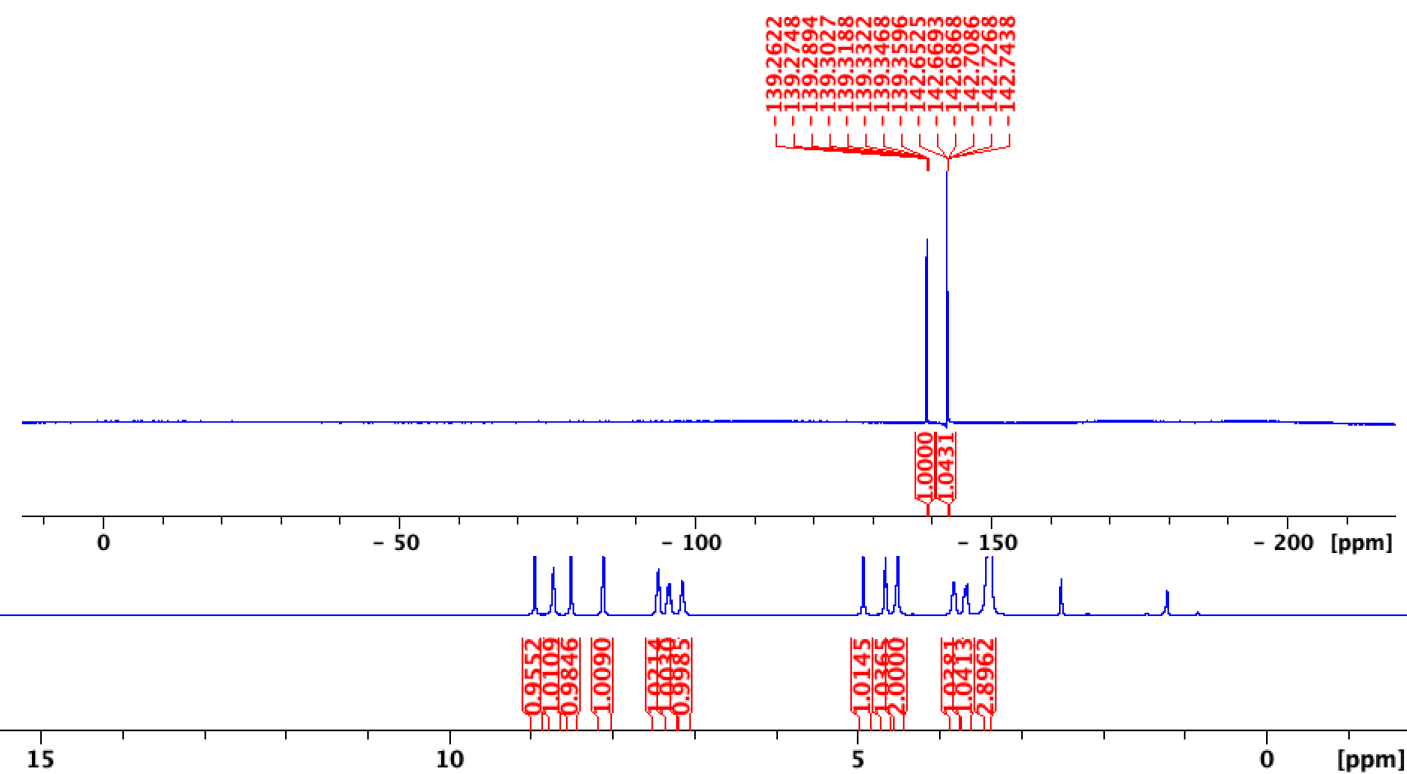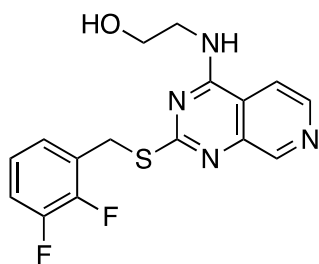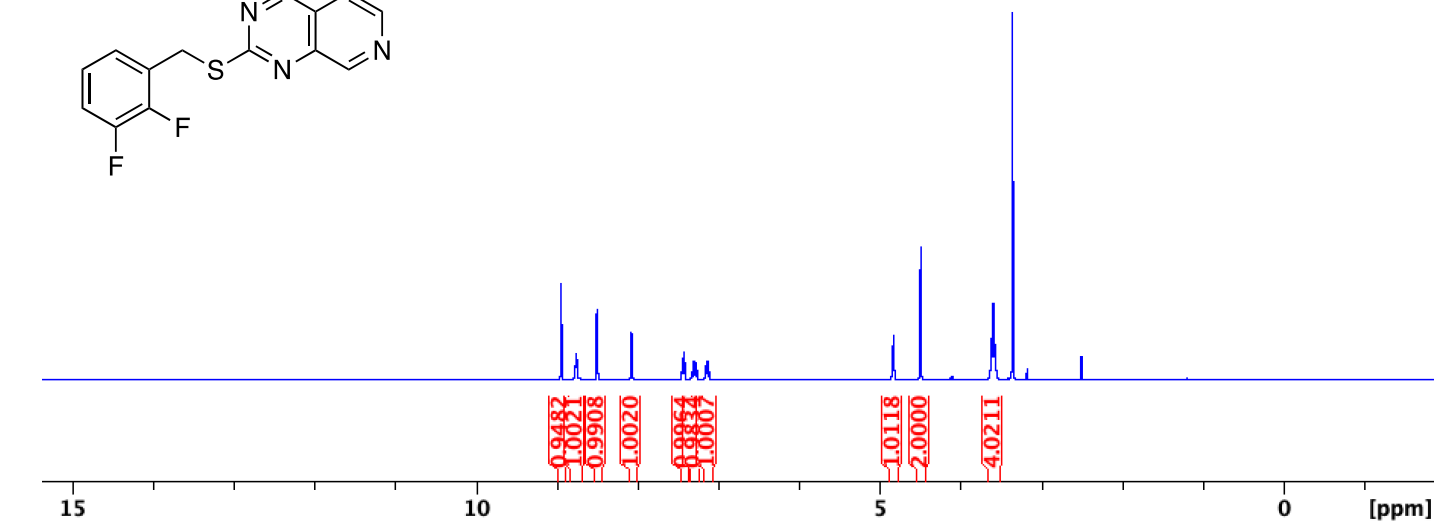

Difluorobenzylmercapto)-pyrido[3,4-*d*]pyrimidine-4-yl)amino]ethanol (24d)

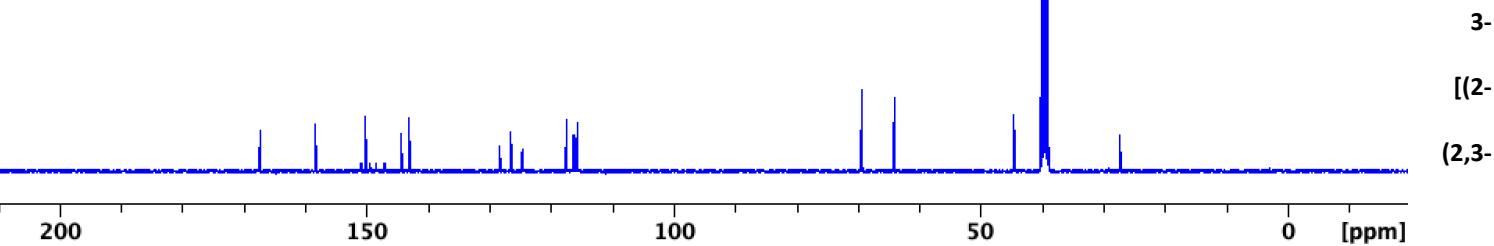

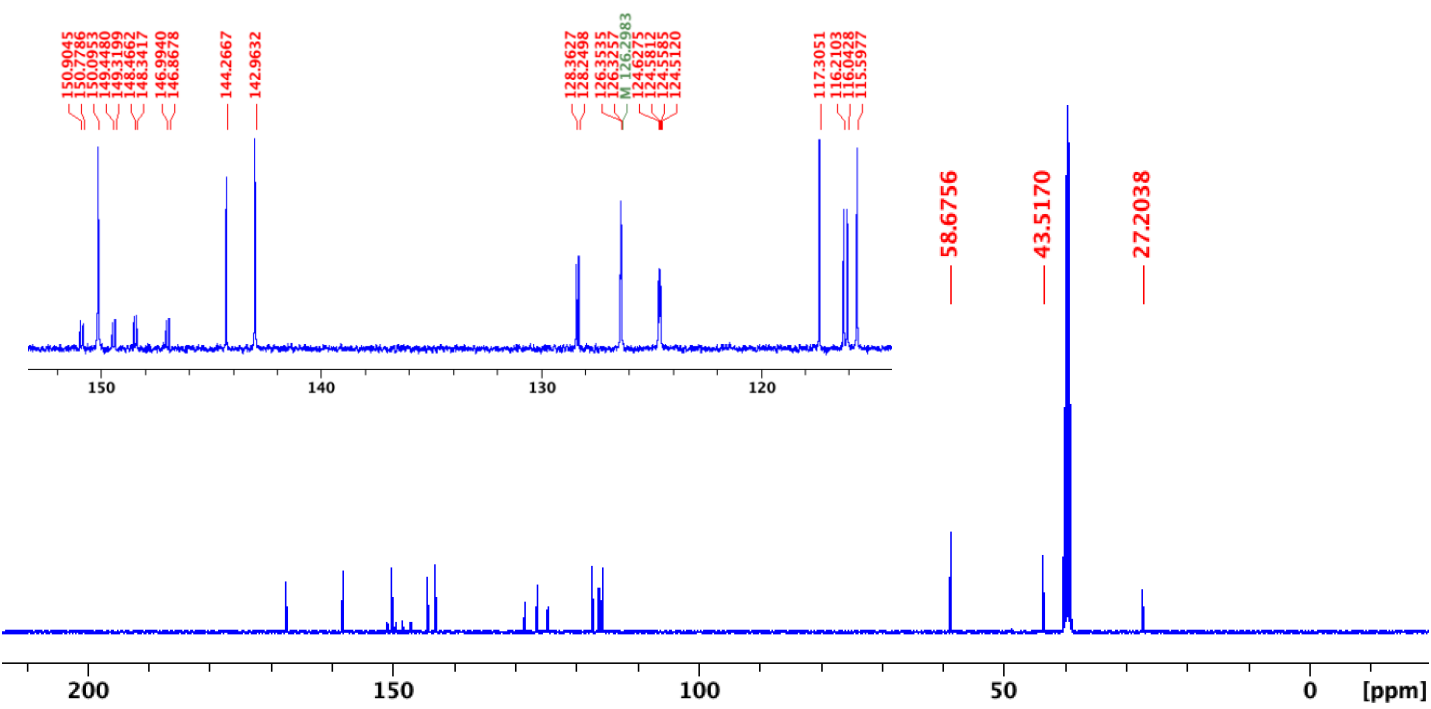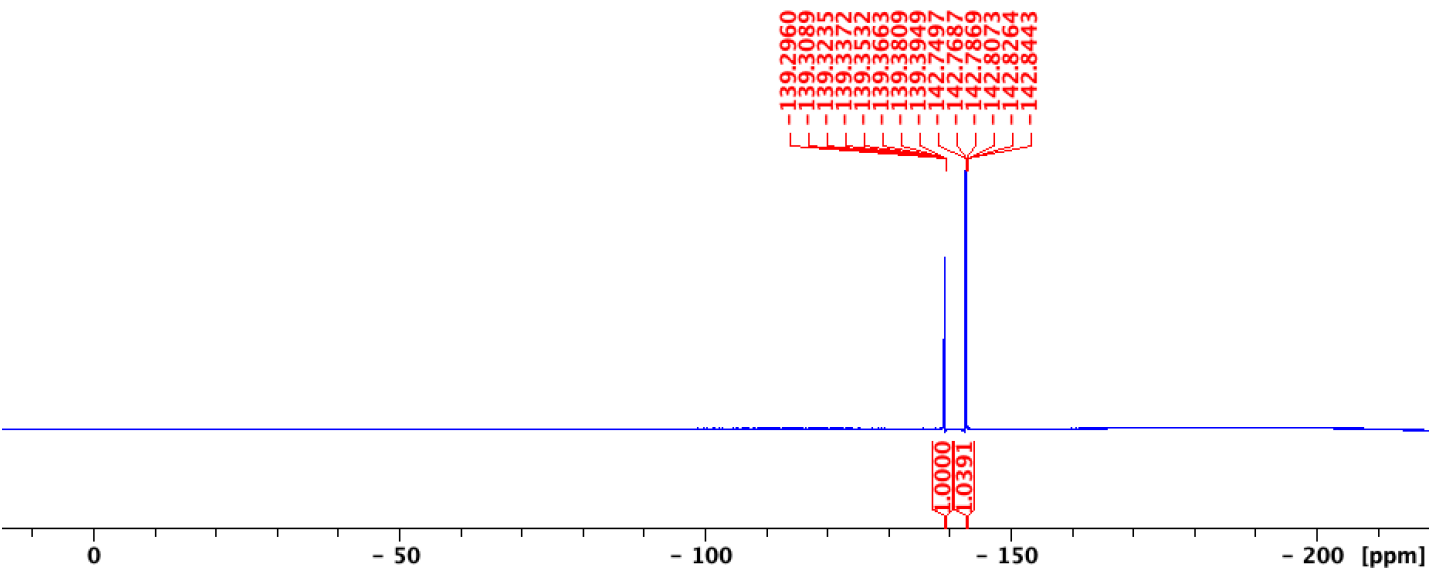

3-[(2-(2,3-Difluorobenzylmercapto)-pyrido[3,4-*d*]pyrimidine-4-yl)oxy]ethanol (24e)

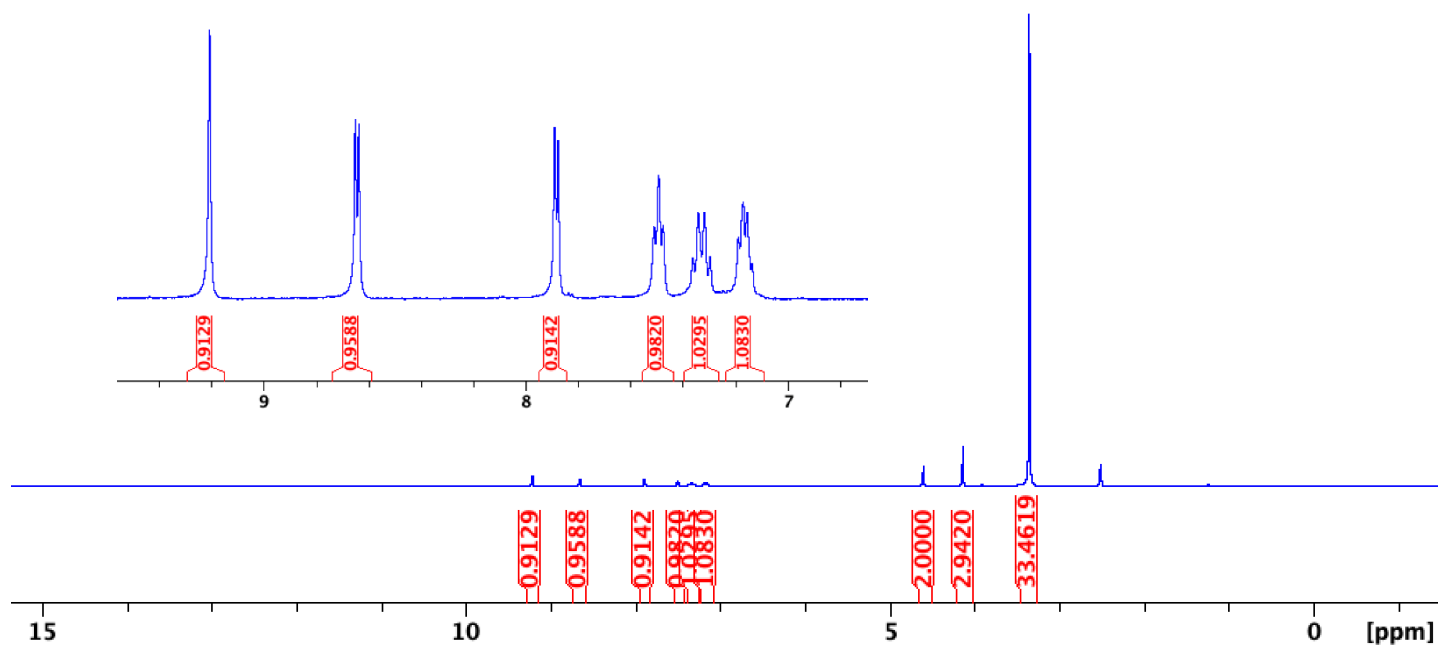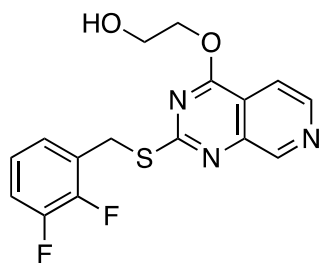

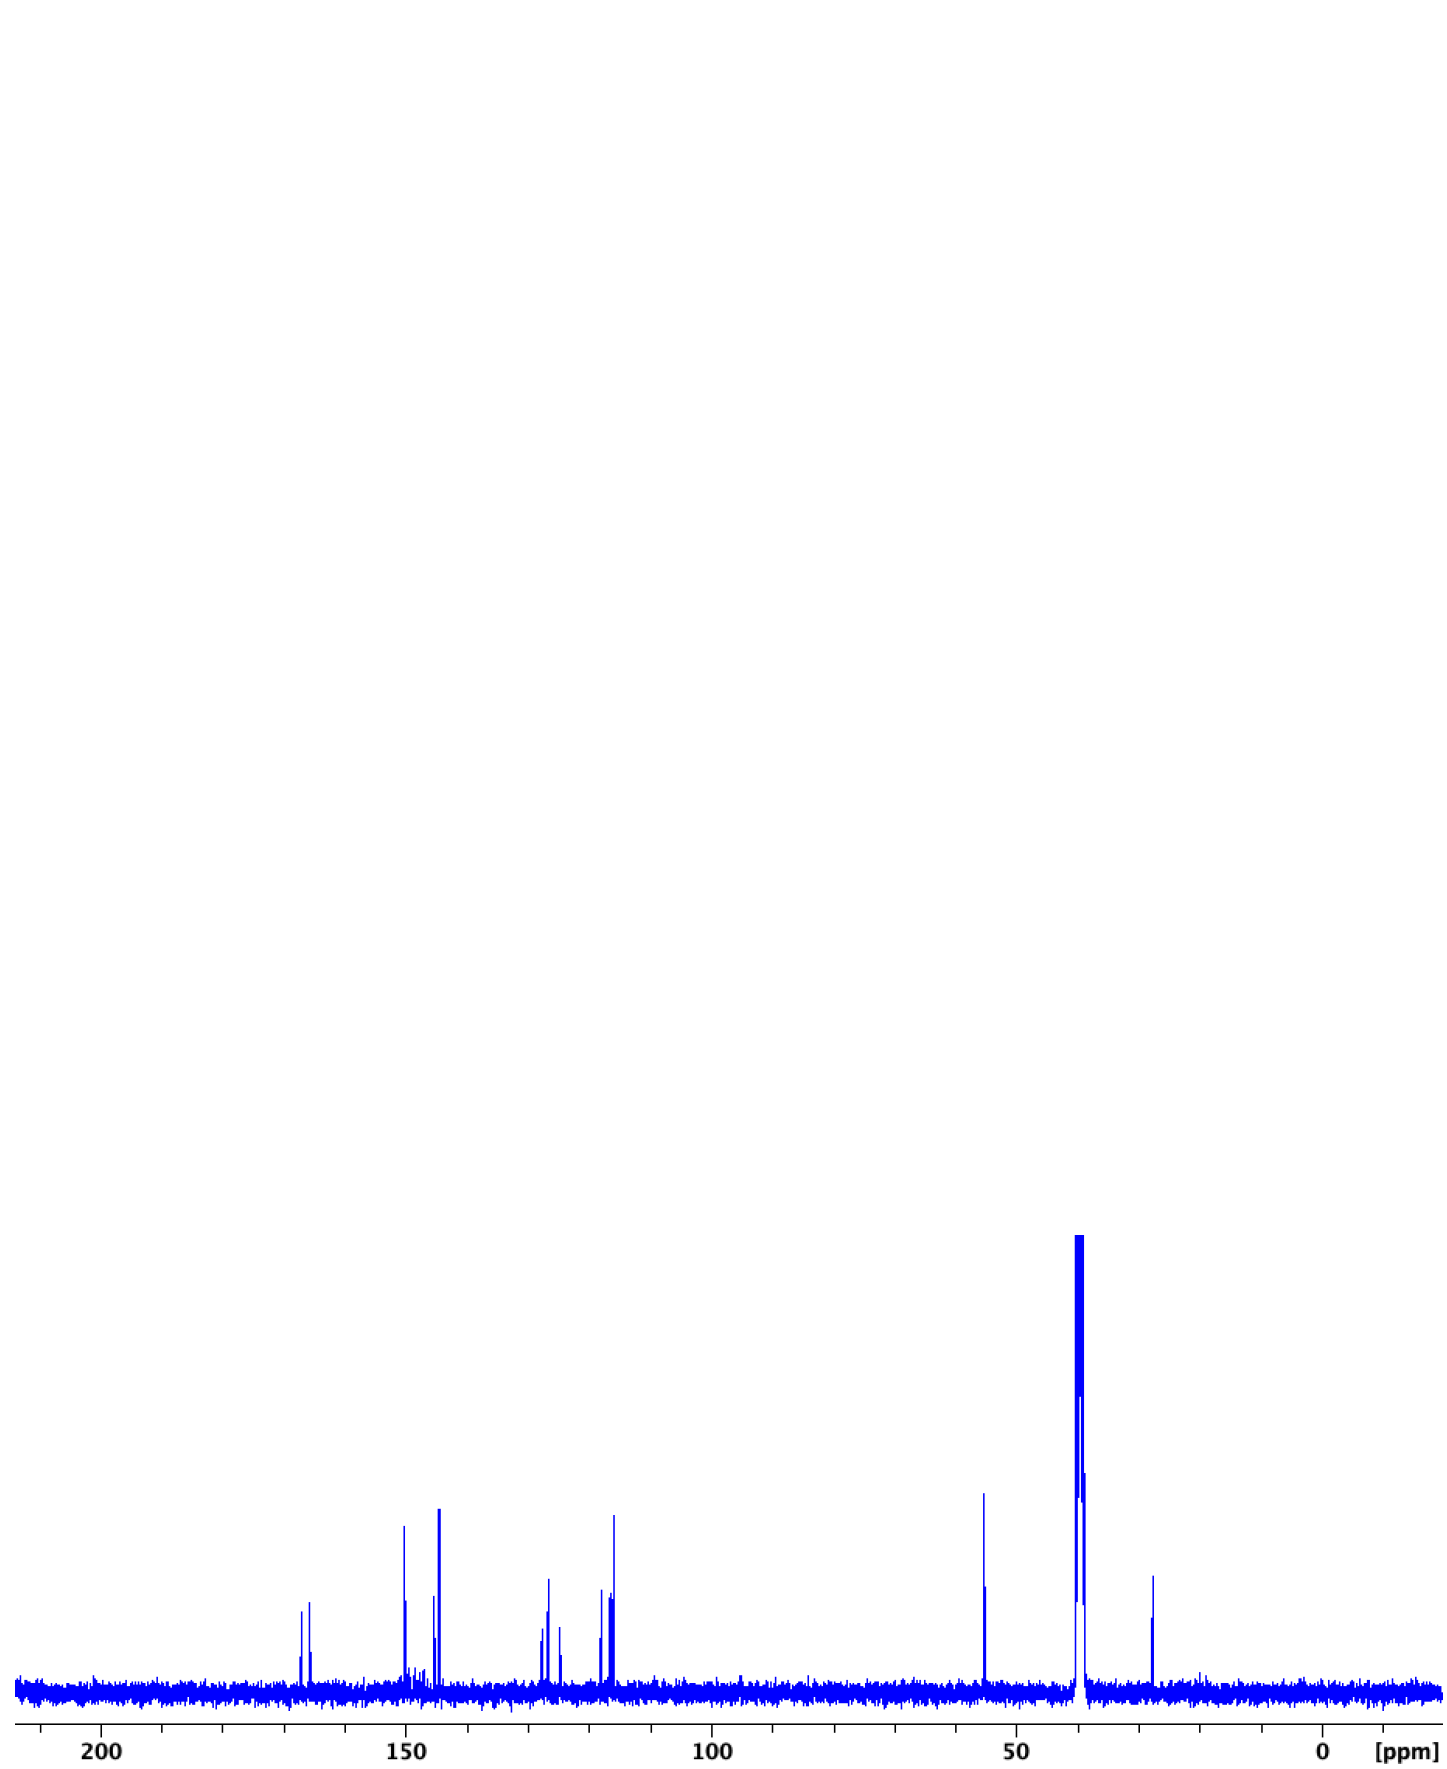

(2*R*)-2-[(6-Chloro-2-pyrido[3,4-*d*]pyrimidine-4-yl)amino]propanol (25)

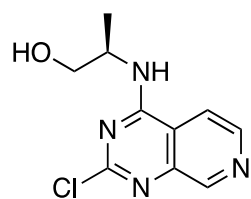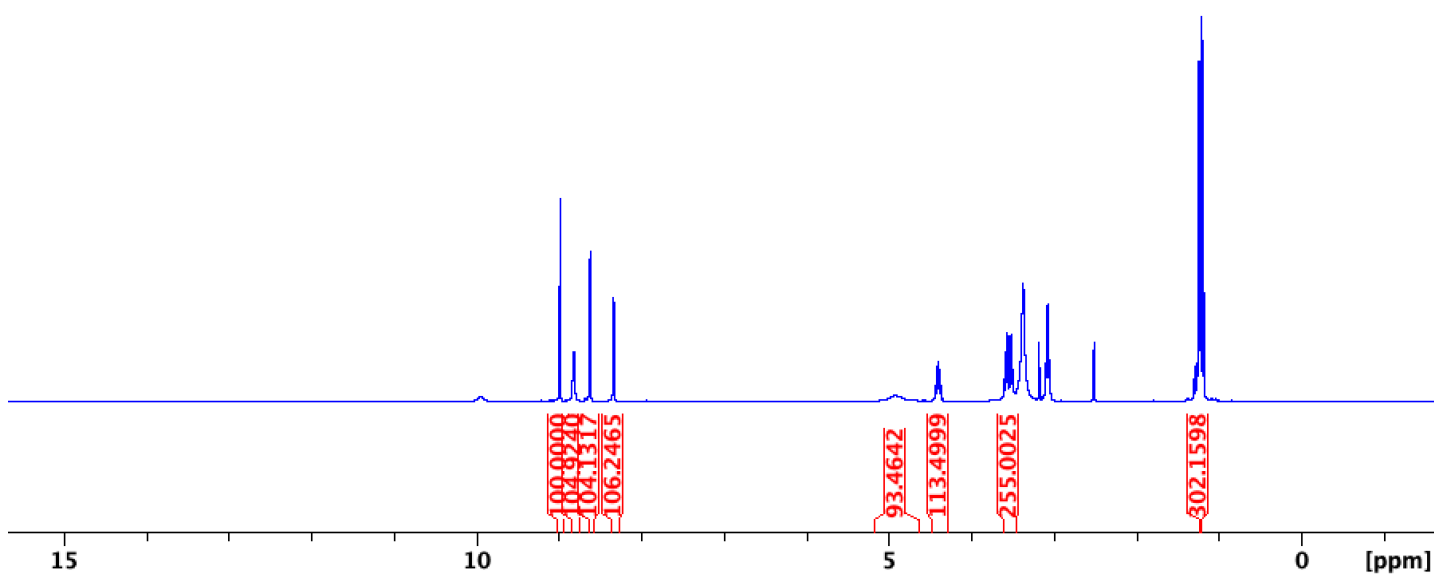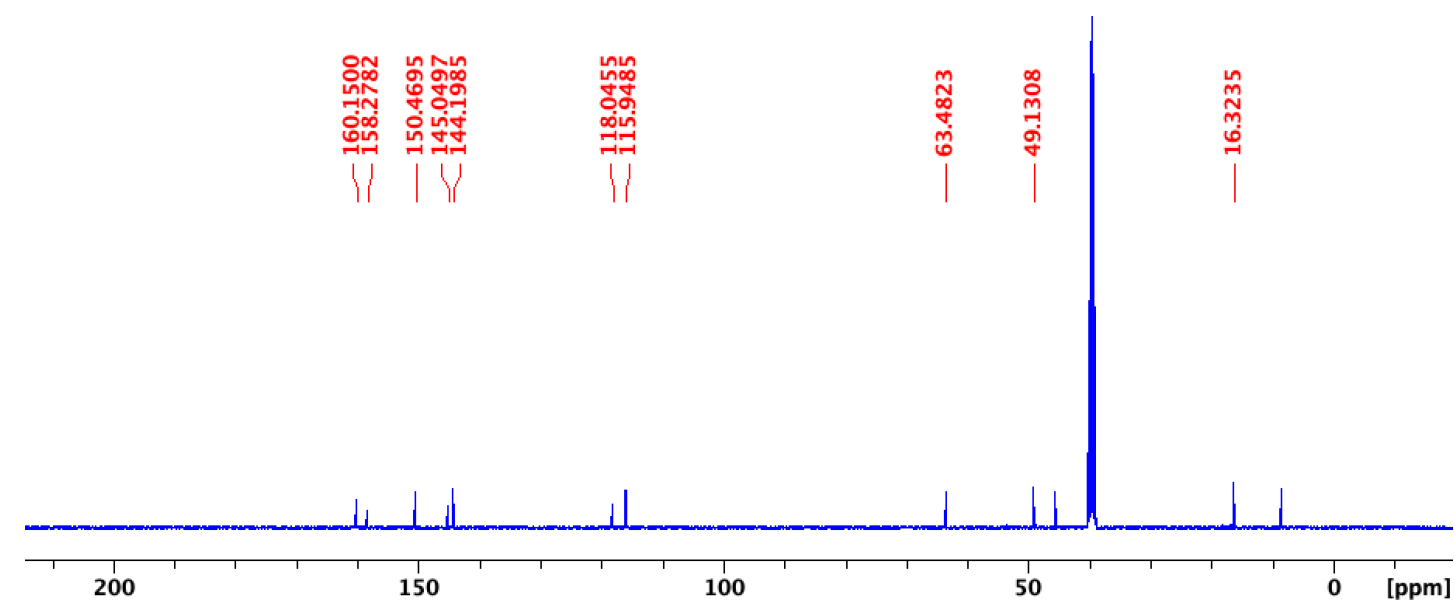

(2R)-2-[(2-(2,3-Difluorobenzylamino)-pyrido[3,4-d]pyrimidine-4-yl)amino]propanol (26a)

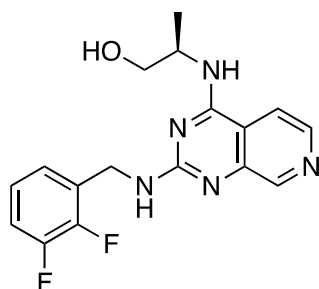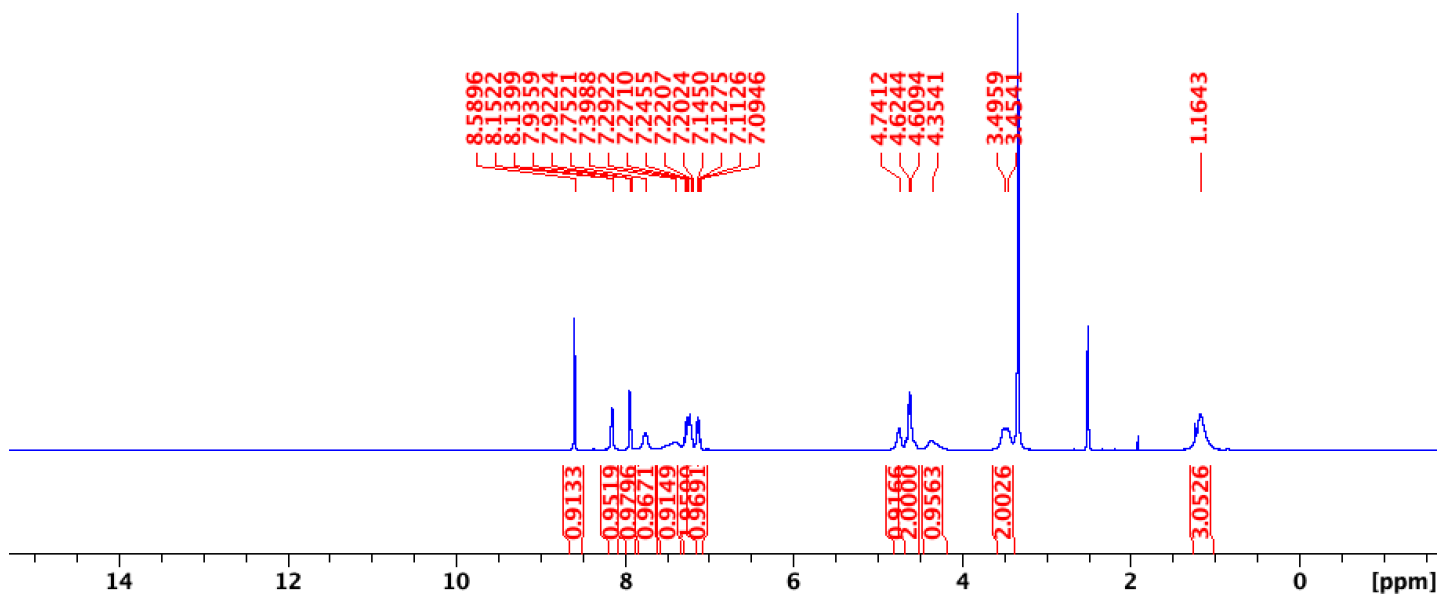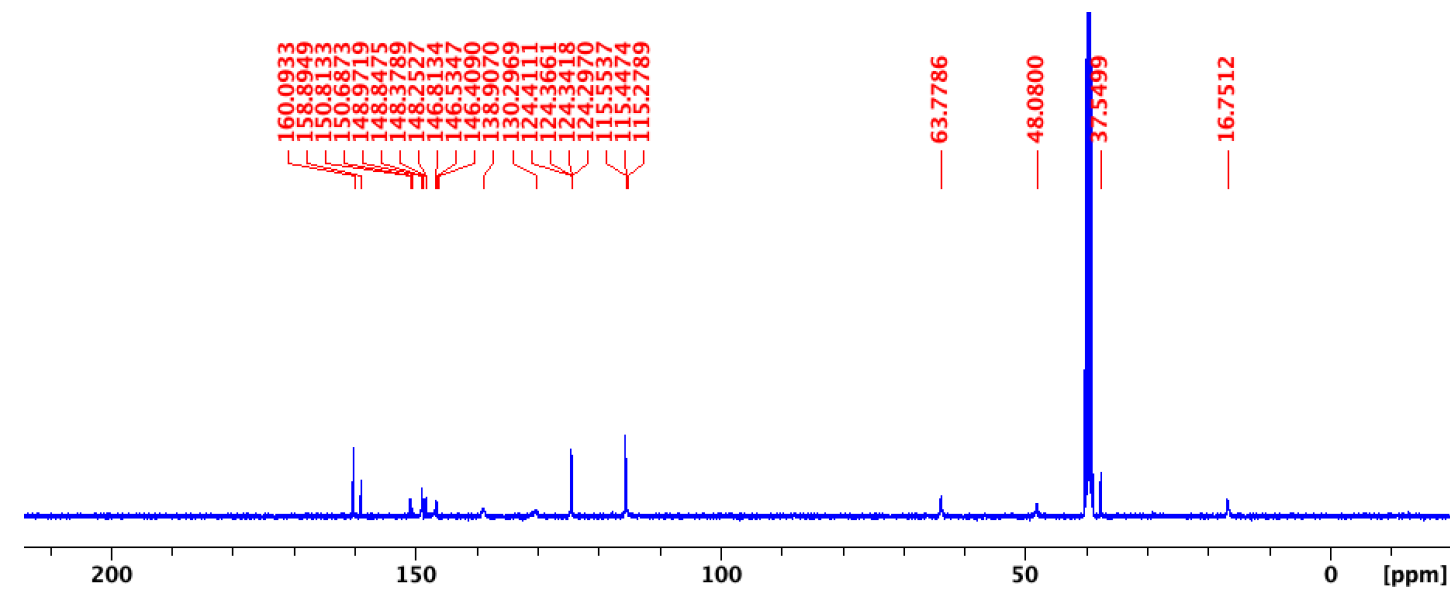

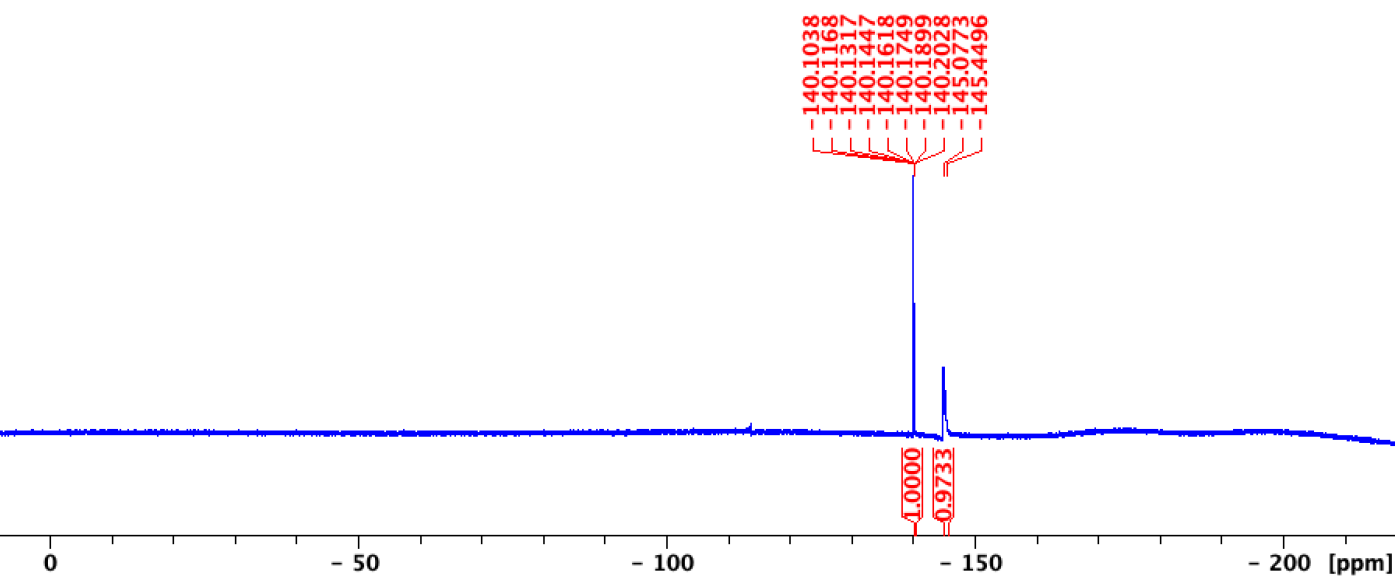

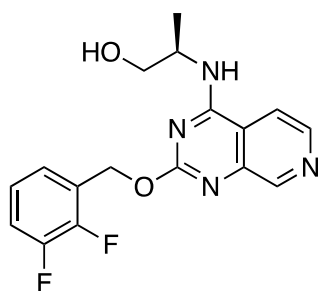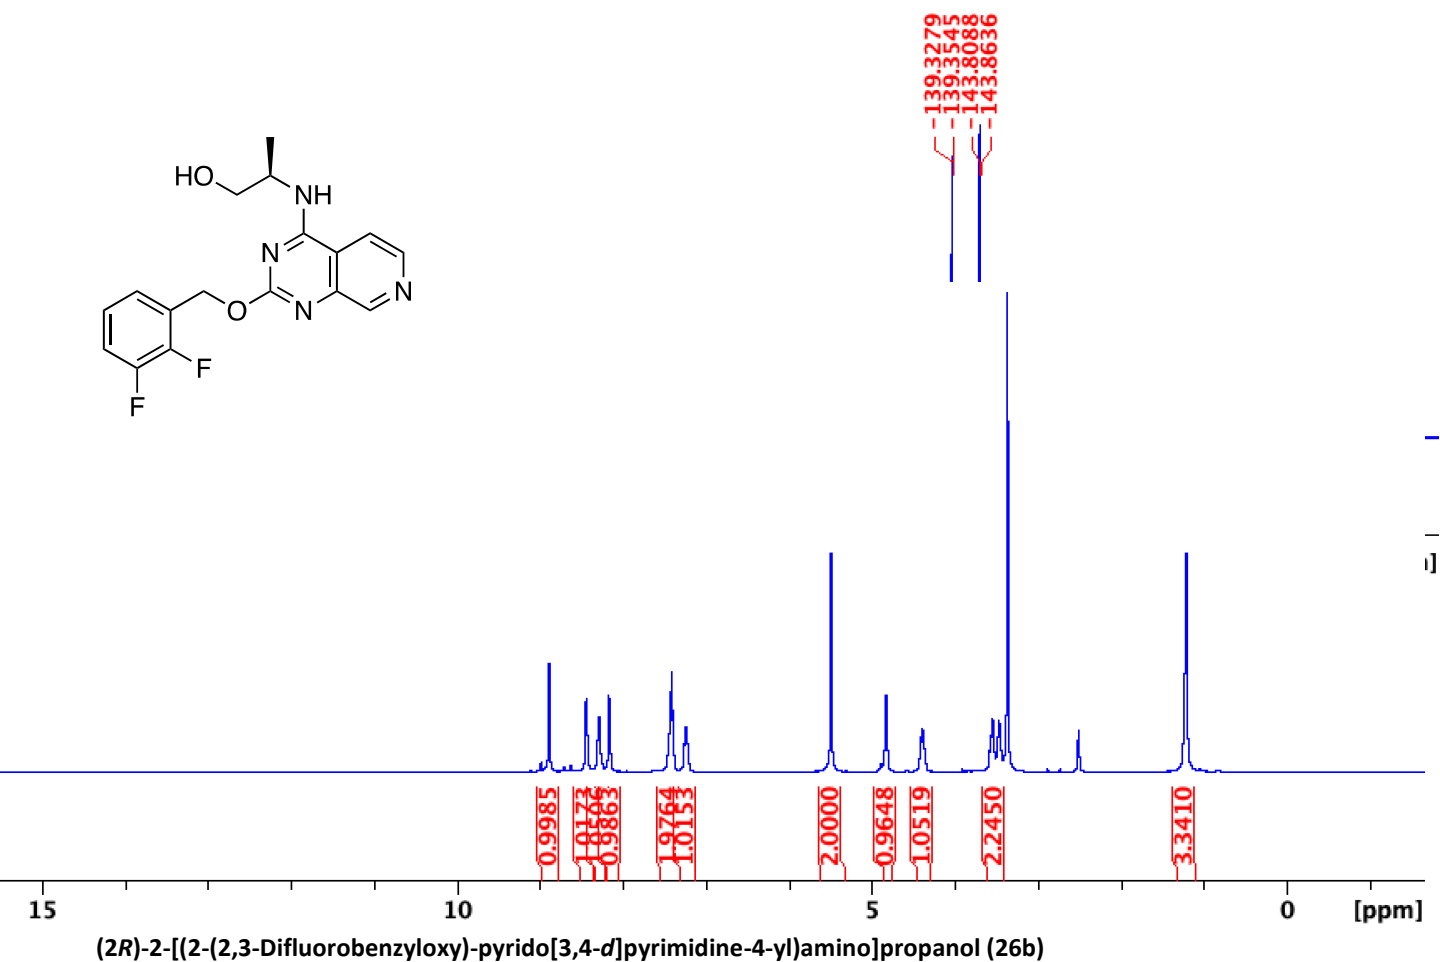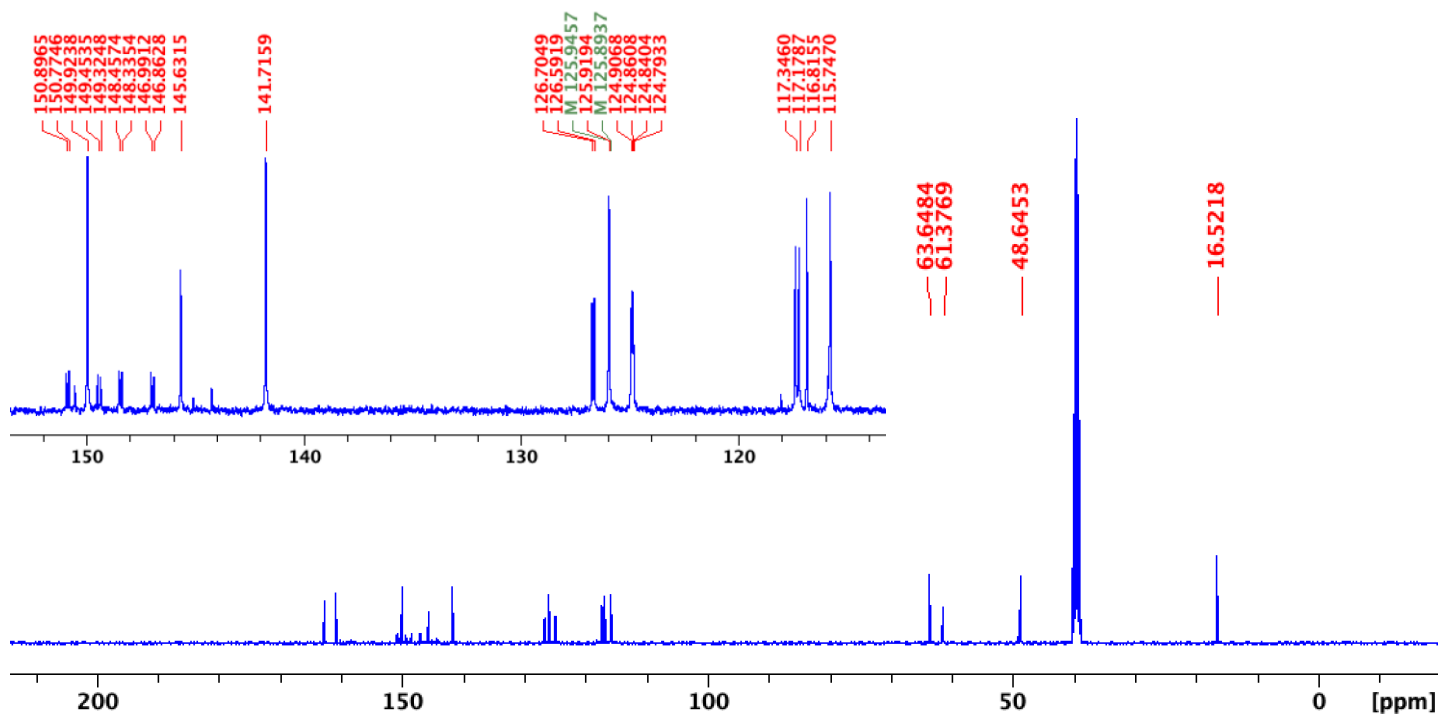



(2R)-2-[(2-(Phenylmercapto)-pyrido[3,4-*d*]pyrimidine-4-yl)amino]propanol (26c)

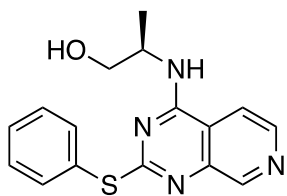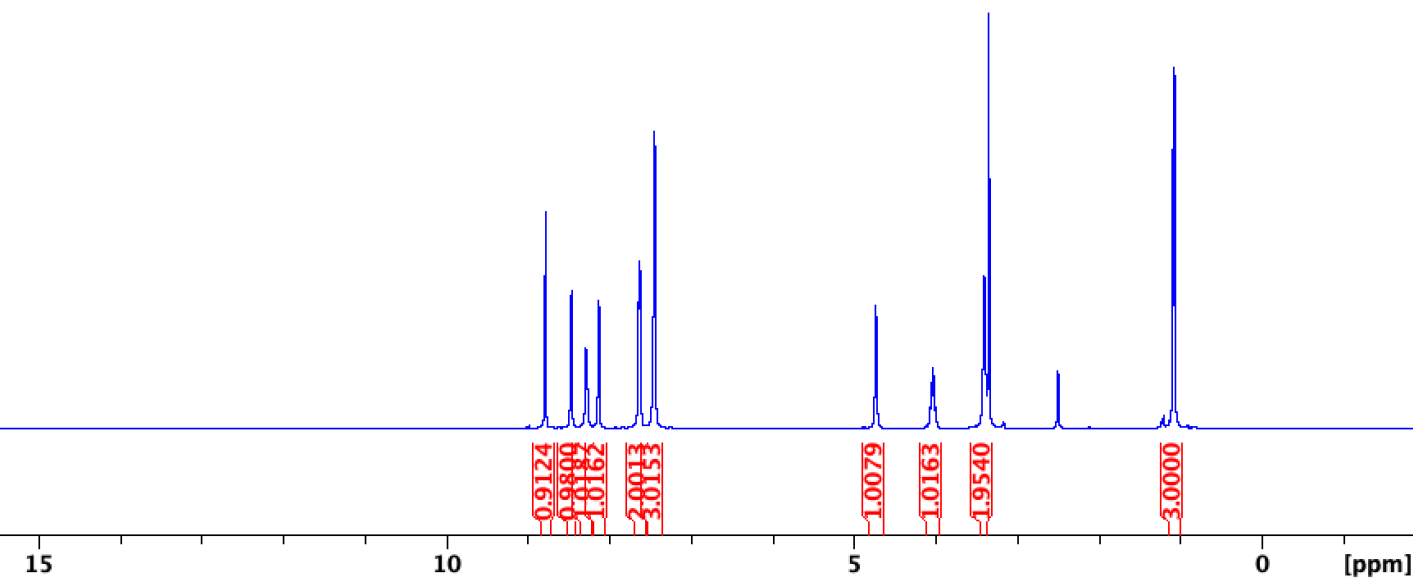

(2R)-2-[(2-(Phenylethylmercapto)-pyrido[3,4-*d*]pyrimidine-4-yl)amino]propanol (26d)

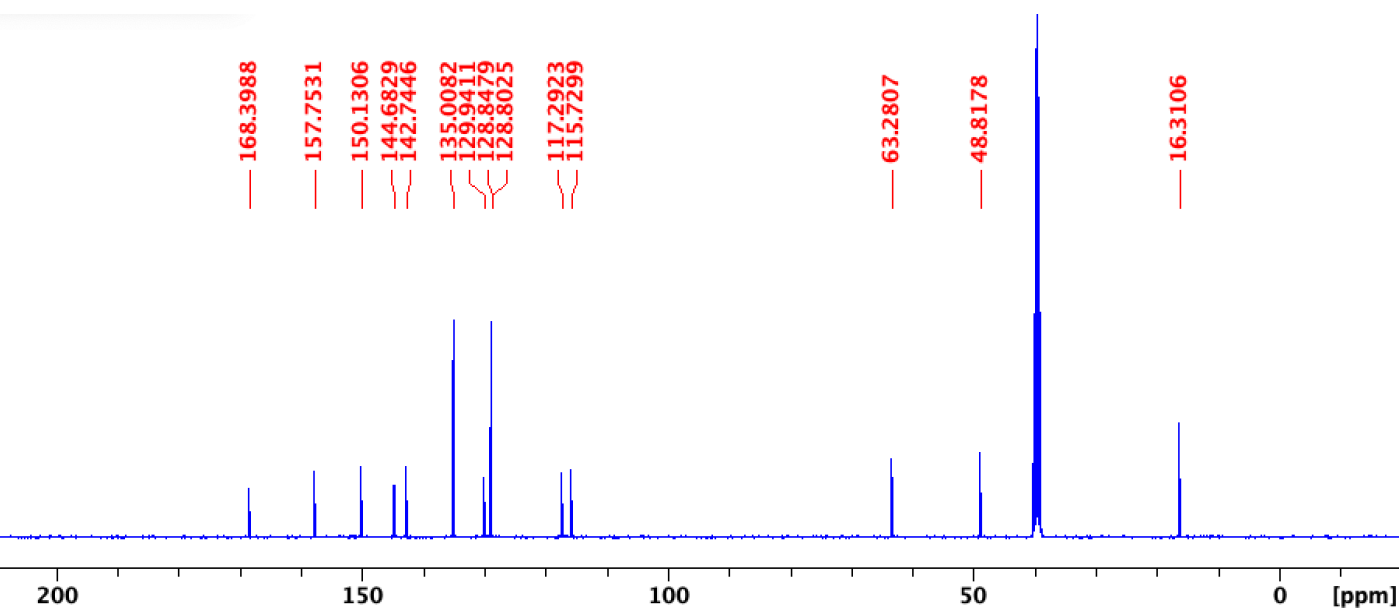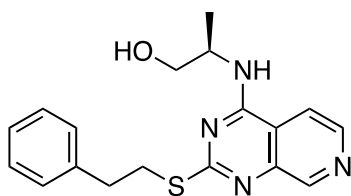

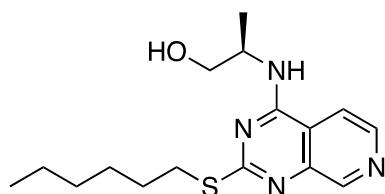

(2*R*)-2-[(2-(Hexylmercapto)-pyrido[3,4-*d*]pyrimidine-4-yl)amino]propanol (26e)

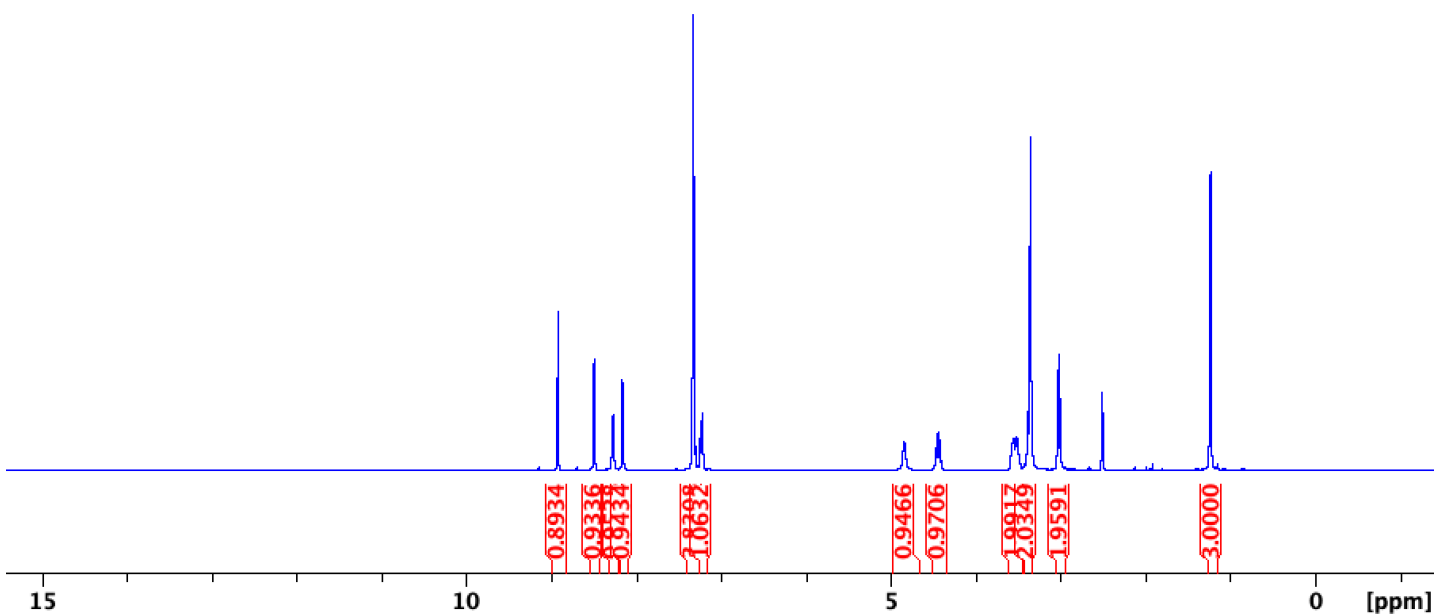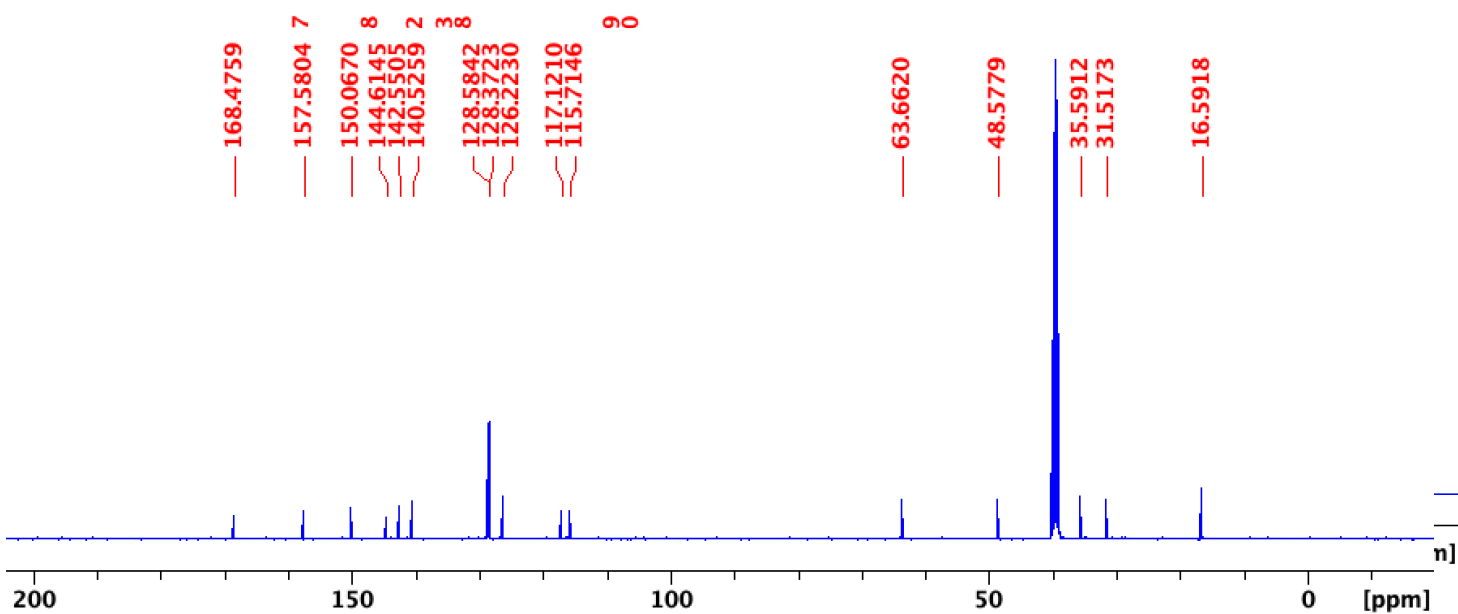

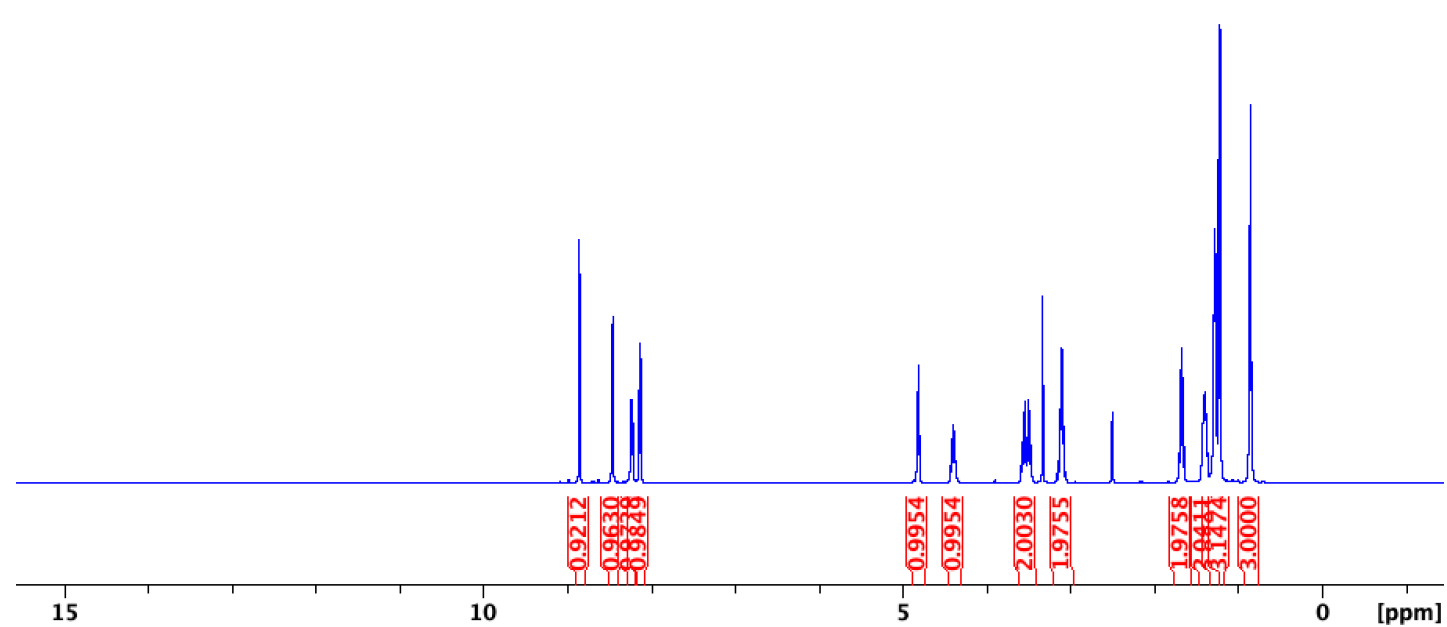

Supplement: s1 [file s1]
